# Supplementary material
Source: Research Square preprint supplement (doi:10.21203/rs.3.rs-10069476/v1)
Supplement: Supplementary file 1 [file 0aed170d40b1bca715d22f2f.xlsx]

## Sheet: Supplementary Table 3
shRNA target sequences used in this study
shRNA	Target sequence (sense, 5′ to 3′)
shSpon2-1	GCAGACTTCCACAGAGTTAGA
shSpon2-2	GGATCTTTATCCACACGATGC
shSpon2-3	GGCAGACTTCCACAGAGTTAGT
shSpon2-4	GAATGAGTATGTCAGCAATGG
shSlc38a1-1	GCCTCCGTATGCTCGGGTACC
shSlc38a1-2	GCGCCTCGCAGGAGCCAATGA
shSlc38a1-3	GGAGCCAATGAGTCAGGTTGG
shSlc38a1-4	GCGCGGCGACCAGCGGCATGT
