# Supplementary material
Source: Research Square preprint supplement (doi:10.21203/rs.3.rs-10069476/v1)
Supplement: Supplementary file 2 [file 413510f7471f354a1fd1506a.xlsx]

## Sheet: Supplementary Table 1
The primers for genotyping used in this study
Primers	Sequences (5’ to 3’)	WT allele/product (bp)	KO allele/product (bp)
Spon2 KO forward 1	CTCCACCCTCTGTAATCCACAGACAC	305	275
Spon2 KO reverse 1	TCACAATCGTCACCATCTGGCTG
Spon2 WT forward 1	GGCACTGTCCTACTAGATGCTGGGTA
Spon2 WT reverse 1	CAGACGGGAATCATGGAAATTACC
