# Supplementary material
Source: Research Square preprint supplement (doi:10.21203/rs.3.rs-10069476/v1)
Supplement: Supplementary file 3 [file 680b692e14d0cf57e45c64d4.xlsx]

## Sheet: Supplementary Table 4
Antibodies used in this study
Antibody (Target)	Supplier	Catalog #	RRID	Host / Clone	Application(s) relevant to this study
Keratin 8	Proteintech	10384-1-AP	N/A	Rabbit polyclonal	IF, 1:200
Keratin 14	Proteintech	10143-1-AP	AB_2134831	Rabbit polyclonal	IF, 1:200
Ki-67	ABclonal	A20018	N/A	Rabbit monoclonal	IF, 1:200
mTOR	CST	2983	AB_2105622	Rabbit monoclonal (clone 7C10)	WB, 1:1000
Phospho-mTOR (Ser2448)	CST	2971	AB_330970	Rabbit polyclonal	WB, 1:1000
HA tag	CST	2999S	AB_1264166	Mouse monoclonal (clone 6E2, IgG1), HRP conjugate	WB, 1:1000
FLAG tag	Abcam	ab49763	AB_869428	Mouse monoclonal (clone M2, IgG1), HRP conjugate	WB, 1:1000
Anti-FLAG magnetic beads	Bimake	B26101	N/A	Mouse monoclonal-conjugated magnetic beads	IP / pull-down, according to manufacturer’s protocol
GAPDH	ABclonal	AC002	AB_2736879	Mouse monoclonal	WB, 1:5000
β-Actin	ABclonal	AC006	N/A	Rabbit polyclonal	WB, 1:10000
Cleaved Caspase-3 (Asp175)	Proteintech	25128-1-AP	AB_3073913	Rabbit polyclonal	IF, 1:200
GFP	ShareBio	SB-AB0005	N/A	Mouse monoclonal	WB, 1:5000
β-Tubulin	Abways	AB0039	AB_2904143	Rabbit recombinant monoclonal	WB, 1:3000
ATP1A1 (Na+/K+-ATPase)	ABclonal	A11683	AB_2861628	Rabbit monoclonal	WB, membrane fraction marker
Goat anti-Rabbit IgG (H+L), Alexa Fluor 488	Proteintech	SA00006-2	AB_2651036	Goat polyclonal secondary antibody	IF, 1:500
Goat anti-Rabbit IgG (H+L), Alexa Fluor 546	Invitrogen / Thermo Fisher Scientific	A-11010	AB_2534077	Goat polyclonal secondary antibody	IF, 1:500
Goat anti-Rat IgG (H+L), Alexa Fluor 647	Jackson ImmunoResearch	112-605-003	AB_2338393	Goat polyclonal secondary antibody	IF, 1:500
CD24-FITC	eBioscience	11-0242-85	N/A	Rat monoclonal, clone M1/69	FACS, 1:100
CD49f / Integrin-APC	eBioscience	17-0495-82	N/A	Rat monoclonal	FACS, 1:100
