# Supplementary material
Source: Research Square preprint supplement (doi:10.21203/rs.3.rs-10069476/v1)
Supplement: Supplementary file 4 [file bcb2f5a0015831b525a935f2.xlsx]

## Sheet: Supplementary Table 5
SPON2–3×FLAG Pull-down and Mass Spectrometry
Genes	logFC	AveExpr	t	P.Value	adj.P.Val	B
Rab39b	16.9411	12.7492	26.1653	0.000265351	0.198045	-1.67615
Fhl2	17.0984	12.8278	25.6322	0.000280337	0.198045	-1.67854
Ube2o	-16.0604	12.275	-24.5001	0.000316242	0.198045	-1.68414
Ptges	16.7244	12.6408	23.8974	0.000337964	0.198045	-1.68744
Clk2	16.4095	12.4834	23.085	0.00037062	0.198045	-1.69228
Znf263	16.2906	12.4239	22.4777	0.000397921	0.198045	-1.69624
Commd3	15.6725	12.1149	22.3794	0.0004026	0.198045	-1.69692
Dnajc9	-15.6783	12.2266	-20.8621	0.000485429	0.198045	-1.70845
Mpnd	15.8247	12.1909	20.3142	0.000521092	0.198045	-1.71324
Dock1	15.2098	11.8835	19.8089	0.000557247	0.198045	-1.71799
Wrnip1	-15.9794	12.4825	-17.5533	0.000768678	0.242292	-1.74418
Mrps11	15.648	12.1026	17.1467	0.000818094	0.242292	-1.74997
Exoc3	-15.515	12.1458	-16.1809	0.000954315	0.260895	-1.7654
Ap3s1	16.9241	12.7406	14.2544	0.00133577	0.322791	-1.8053
Skp1	15.758	12.1576	14.1487	0.00136237	0.322791	-1.80794
Krt13	19.6233	14.0903	11.2795	0.00278884	0.619471	-1.97507
Plk1	-19.2123	11.7666	-9.33623	0.00452047	0.945045	-2.08573
Gsk3a	-17.5259	10.9234	-8.7939	0.00526293	0.999997	-2.12802
Lancl2	18.6614	13.6093	8.56268	0.00563077	0.999997	-2.14807
Llgl1	-5.9543	16.3675	-8.06003	0.00597151	0.999997	-2.13729
Emc4	-15.4111	12.1714	-6.87946	0.00976783	0.999997	-2.34385
Hagh	12.4329	12.9712	5.547	0.016632	0.999997	-2.59445
Lman2	-10.0945	16.4115	-4.95117	0.0219115	0.999997	-2.75024
Gorasp2	-8.49392	15.7408	-3.80636	0.040673	0.999997	-3.16556
Dnaaf10	13.7095	11.1334	3.65916	0.0460751	0.999997	-3.25305
Eif3b	-7.74913	14.8403	-3.18841	0.0609241	0.999997	-3.48066
Zfp13	2.60629	23.1406	2.67861	0.0848996	0.999997	-3.7797
Gatad2b	-10.7254	14.4425	-2.73874	0.0855596	0.999997	-3.76334
Ckap4	-1.9276	20.5567	-2.43638	0.103117	0.999997	-3.95403
Ahcy	-1.66718	23.4709	-2.38851	0.107287	0.999997	-3.99012
Atp6ap2	-10.2528	9.33567	-2.17809	0.133345	0.999997	-4.16734
Ap3b2	-10.034	9.48419	-2.13669	0.138096	0.999997	-4.20011
Tln1	-1.72941	21.7872	-2.04429	0.144421	0.999997	-4.26505
Pfn1	-1.26309	23.2565	-1.95382	0.156713	0.999997	-4.34157
Pola2	-11.4223	10.0303	-1.97281	0.159112	0.999997	-4.33357
Gpi	-1.37276	22.4128	-1.90926	0.163235	0.999997	-4.37985
Psat1	-1.43124	22.6727	-1.88629	0.166723	0.999997	-4.39972
Hmga1	1.29484	23.0925	1.864	0.170196	0.999997	-4.41911
Hspa4	-1.2019	22.7736	-1.86097	0.170674	0.999997	-4.42174
Hsp90aa1	-1.23819	24.6668	-1.8547	0.171671	0.999997	-4.42722
Ppig	1.20258	23.0815	1.85177	0.172138	0.999997	-4.42978
Psmd1	-1.34887	20.6456	-1.83139	0.175435	0.999997	-4.44762
Cct7	-1.13983	23.2121	-1.64459	0.209419	0.999997	-4.61406
Psmb4	-1.24257	22.5754	-1.62813	0.21277	0.999997	-4.62895
Nnt	-7.04902	17.4928	-1.62654	0.218066	0.999997	-4.63273
Atic	-1.27284	20.3695	-1.59832	0.218998	0.999997	-4.65598
Ctcf	1.25952	22.6036	1.59032	0.220705	0.999997	-4.66325
Ptk7	-1.61106	20.8879	-1.57299	0.224455	0.999997	-4.67901
Rrp9	-4.2833	4.30212	-1.5656	0.230436	0.999997	-4.68707
Ewsr1	-4.3186	4.31977	-1.56585	0.230451	0.999997	-4.68687
Appl1	-4.38401	4.35248	-1.56601	0.230542	0.999997	-4.68676
Rack1	-1.33989	25.4581	-1.54354	0.231	0.999997	-4.70586
Nudt2	-4.53865	4.4298	-1.56494	0.231081	0.999997	-4.68781
Parp12	-4.5574	4.43917	-1.56471	0.231162	0.999997	-4.68802
Cwc15	-4.58547	4.45321	-1.5645	0.23123	0.999997	-4.68822
Rab31	-4.58818	4.45456	-1.56449	0.231232	0.999997	-4.68823
Erc1;Erc2	-4.6136	4.46727	-1.56436	0.231259	0.999997	-4.68834
Tmem209	-4.64415	4.48254	-1.56416	0.231304	0.999997	-4.68853
Vapa	-4.65728	4.48911	-1.56405	0.231327	0.999997	-4.68862
Eef1a2	-4.66243	4.49168	-1.56401	0.231337	0.999997	-4.68866
Sarnp	-1.11092	20.2732	-1.52033	0.236312	0.999997	-4.72705
Khsrp	-1.06312	22.0369	-1.51599	0.23732	0.999997	-4.73102
rp9	1.88512	27.2315	1.50276	0.240776	0.999997	-4.74318
Uchl1	-1.73089	19.8103	-1.46182	0.250334	0.999997	-4.78063
Myh9	1.05614	24.6381	1.45918	0.250987	0.999997	-4.78304
Zfp3	1.37725	23.1209	1.4394	0.255953	0.999997	-4.80118
Tsn	-6.48934	16.7621	-1.45787	0.256084	0.999997	-4.7844
Ckb	-1.81967	22.5599	-1.43424	0.257672	0.999997	-4.80591
Eif3l	-0.99488	22.0775	-1.42027	0.260861	0.999997	-4.81873
Nxn	8.7619	15.4788	1.42753	0.263708	0.999997	-4.81189
Slc30a7	1.10083	20.5956	1.40743	0.264214	0.999997	-4.83051
Znf629	1.14249	22.849	1.39829	0.266631	0.999997	-4.8389
Vasp	-9.27974	6.80034	-1.40416	0.269761	0.999997	-4.83309
Spag9	-9.41229	6.86662	-1.40048	0.270727	0.999997	-4.83643
Cnot2	-9.47511	6.89803	-1.39877	0.271179	0.999997	-4.83798
Cdk4	-9.55845	6.93969	-1.39652	0.271771	0.999997	-4.84002
Rps17	1.04563	22.0237	1.37686	0.272393	0.999997	-4.85856
Golga7	-9.6831	7.00202	-1.39323	0.272645	0.999997	-4.84301
Ppfibp1;Ppfibp2	-9.68972	7.00533	-1.39305	0.272691	0.999997	-4.84317
Rbm3	-9.69447	7.00771	-1.39293	0.272724	0.999997	-4.84328
Cops4	-0.945959	21.2377	-1.37468	0.272985	0.999997	-4.86055
Dld	-6.57119	17.4105	-1.39098	0.273243	0.999997	-4.84505
Cnnm2	-9.16113	6.74103	-1.38846	0.273913	0.999997	-4.84733
Ppp4r3b	-9.18664	6.75379	-1.3878	0.27409	0.999997	-4.84793
Polr2i	-10.0187	7.16984	-1.38469	0.274921	0.999997	-4.85075
Poglut2	-9.36462	6.84278	-1.38325	0.275308	0.999997	-4.85206
Repin1	9.74765	17.023	1.38229	0.275566	0.999997	-4.85293
Fermt1	-10.1991	7.26004	-1.3803	0.276099	0.999997	-4.85473
Vps26a;Vps26b	-9.51934	6.92014	-1.3794	0.276342	0.999997	-4.85555
Heatr5b	-9.59318	6.95706	-1.3776	0.276828	0.999997	-4.85719
Pccb	-9.61764	6.96929	-1.37701	0.276988	0.999997	-4.85772
Rint1	-9.62786	6.9744	-1.37676	0.277055	0.999997	-4.85795
Strn	-9.68461	7.00278	-1.3754	0.277423	0.999997	-4.85918
Ahcyl1	-10.4699	7.39542	-1.37396	0.277812	0.999997	-4.86049
Tm4sf1	-10.4951	7.40801	-1.37339	0.277968	0.999997	-4.86101
Csnk2a1	-10.5017	7.41133	-1.37324	0.278009	0.999997	-4.86115
Iap	-10.5141	7.41754	-1.37296	0.278086	0.999997	-4.8614
Iqcn;Pf4	-10.5389	7.42994	-1.37239	0.278238	0.999997	-4.86191
Ppic	-9.85552	7.08823	-1.37138	0.278514	0.999997	-4.86283
Mllt3	-9.91549	7.11822	-1.36999	0.278891	0.999997	-4.86409
Tmem256	-10.7068	7.51389	-1.36865	0.279258	0.999997	-4.86531
Spcs3	-9.98792	7.15443	-1.36834	0.279342	0.999997	-4.86559
Rplp2	-10.7285	7.52473	-1.36817	0.279387	0.999997	-4.86574
Ddx11	-10.1684	7.24468	-1.36431	0.280445	0.999997	-4.86925
Ifi44l	-10.1851	7.25302	-1.36394	0.280545	0.999997	-4.86958
Slc30a9	-10.1877	7.25434	-1.36388	0.280561	0.999997	-4.86964
Fbn1;Fbn2	-10.1933	7.25714	-1.36376	0.280595	0.999997	-4.86975
Ufc1	-10.9836	7.65226	-1.3627	0.280885	0.999997	-4.87071
Col2a1	-11.023	7.67195	-1.36188	0.281112	0.999997	-4.87146
Trmu	-10.284	7.30244	-1.36178	0.281136	0.999997	-4.87154
Mydgf	-10.4264	7.37369	-1.35874	0.281974	0.999997	-4.8743
Casp7	-10.4872	7.40405	-1.35747	0.282326	0.999997	-4.87546
Rraga;Rragb	-10.4913	7.40612	-1.35738	0.28235	0.999997	-4.87554
Bclaf1	-11.3041	7.81252	-1.35614	0.282692	0.999997	-4.87666
Sgk1;Sgk3	-10.5855	7.45324	-1.35543	0.282889	0.999997	-4.87731
Rbm12	-10.6756	7.49826	-1.35359	0.283398	0.999997	-4.87897
Gemin5	-12.6154	16.6905	-1.35236	0.283739	0.999997	-4.88009
Ube2e1;Ube2e2;Ube2e3	-10.8117	7.56631	-1.35086	0.284156	0.999997	-4.88145
Uggt1	-6.27475	17.4708	-1.34942	0.284557	0.999997	-4.88276
Hgh1	-10.8939	7.60739	-1.34924	0.284606	0.999997	-4.88292
Fkbp9	-10.903	7.61198	-1.34907	0.284656	0.999997	-4.88308
Wrn	-11.0099	7.66541	-1.347	0.285233	0.999997	-4.88496
Krt15	-11.8387	8.07982	-1.34593	0.285532	0.999997	-4.88593
Fip1l1	-11.8508	8.08587	-1.3457	0.285594	0.999997	-4.88613
Qdpr	-11.8608	8.09085	-1.34552	0.285645	0.999997	-4.88629
Chordc1	-2.47012	22.775	-1.33497	0.286598	0.999997	-4.89635
Kpna2	-2.08762	21.0902	-1.33204	0.28682	0.999997	-4.89917
Prdm10	-11.4847	7.90282	-1.33822	0.287696	0.999997	-4.89292
Ddah1	-13.0056	8.66328	-1.32638	0.291057	0.999997	-4.90366
Ago2	9.41989	16.772	1.31904	0.293162	0.999997	-4.91031
Hsp90ab1	-0.886526	26.0702	-1.30232	0.293529	0.999997	-4.92682
Ikzf3	10.4148	18.3245	1.31773	0.293538	0.999997	-4.9115
Ythdc1	8.67533	15.9294	1.3167	0.293834	0.999997	-4.91243
Diaph1	-11.2341	15.3062	-1.30088	0.29844	0.999997	-4.92676
Atp6v1b2	-8.96536	16.5581	-1.29991	0.298727	0.999997	-4.92764
Tmtc3	-9.21381	16.9073	-1.29866	0.299096	0.999997	-4.92878
Palld	-3.13912	17.9044	-1.28856	0.300616	0.999997	-4.93841
Ilf3	-1.62896	22.4436	-1.27732	0.301432	0.999997	-4.94951
Mlf2	0.899956	21.6233	1.26927	0.303472	0.999997	-4.95699
Rps23	3.27477	28.4793	1.27985	0.30364	0.999997	-4.94616
Tgm2	8.31064	15.6268	1.27916	0.304895	0.999997	-4.94642
Abl2	-2.44903	5.16261	-1.26678	0.306692	0.999997	-4.95835
Parp1	-1.03709	22.5162	-1.25036	0.30932	0.999997	-4.9742
Crkl	-8.18139	15.6866	-1.26289	0.309832	0.999997	-4.96113
Snd1	-0.879811	22.5254	-1.2471	0.310342	0.999997	-4.97717
Hsd17b10	8.82793	16.34	1.2582	0.311271	0.999997	-4.96537
Kat6a	8.94331	16.7141	1.25149	0.313342	0.999997	-4.97143
Rps27	1.62254	21.61	1.23026	0.316311	0.999997	-4.99218
Nle1	-2.46005	5.24197	-1.23438	0.316775	0.999997	-4.98769
Rrm2b	-2.40781	5.23132	-1.22796	0.318815	0.999997	-4.99349
Top2b	8.4468	16.1481	1.23128	0.319674	0.999997	-4.98965
Imp3	-2.36352	5.21644	-1.22494	0.319781	0.999997	-4.99622
Sema3b	-2.40407	5.24665	-1.22034	0.321256	0.999997	-5.00037
Ube2l3	0.991047	22.5203	1.21204	0.32155	0.999997	-5.00897
Znf354a	0.821398	22.7032	1.21185	0.321613	0.999997	-5.00915
Psph	8.60193	16.1774	1.22488	0.321706	0.999997	-4.99541
Hmgb1	-0.799237	22.3151	-1.20955	0.322363	0.999997	-5.01123
Slit2	9.63838	17.8634	1.22147	0.322796	0.999997	-4.99848
Pgm1	-1.47889	20.858	-1.20791	0.323046	0.999997	-5.01264
Ap3s2	8.62483	16.4879	1.21535	0.32476	0.999997	-5.00398
Skic2	-8.60218	16.5892	-1.2142	0.325132	0.999997	-5.00502
Ddost	-0.776339	23.2258	-1.19835	0.326043	0.999997	-5.02135
Tubgcp3	9.25754	17.3927	1.21116	0.326112	0.999997	-5.00775
Got1	-8.34594	16.2408	-1.21092	0.32619	0.999997	-5.00796
Rusf1	-2.47704	5.31873	-1.20453	0.32638	0.999997	-5.01462
Rps2	-0.970426	26.2936	-1.19577	0.326898	0.999997	-5.02368
Chsy1;Chsy3	9.10174	17.2632	1.20643	0.327649	0.999997	-5.01201
Luc7l	8.72143	16.7029	1.20629	0.327693	0.999997	-5.01213
Smarcd2	9.51881	17.8934	1.20226	0.329007	0.999997	-5.01575
Papln	-2.42605	5.31335	-1.19567	0.329292	0.999997	-5.0226
Hdac6	-2.432	5.31661	-1.19556	0.329326	0.999997	-5.02269
Ldhb	-1.14078	24.3474	-1.18769	0.329588	0.999997	-5.03097
Emc1	8.02333	15.7348	1.20013	0.329705	0.999997	-5.01766
Gtf2i	-11.1872	16.0873	-1.19941	0.329938	0.999997	-5.0183
Cnot11	-2.42688	5.32205	-1.19203	0.330496	0.999997	-5.02587
Snx18	-2.38195	5.30264	-1.19044	0.331023	0.999997	-5.0273
Mrps33	0.957424	21.5997	1.18327	0.331068	0.999997	-5.03495
Mrpl32	8.11271	15.9121	1.19533	0.331278	0.999997	-5.02196
Larp1	-7.85066	15.9307	-1.19328	0.331956	0.999997	-5.0238
Adnp	8.75308	16.8398	1.19296	0.332059	0.999997	-5.02409
Alg8	8.82649	16.971	1.19184	0.332429	0.999997	-5.02509
Slc25a5	-0.851887	28.0272	-1.17864	0.332628	0.999997	-5.03912
Ckap5	-7.84118	16.0223	-1.18858	0.33351	0.999997	-5.02802
P4hb	-1.25527	23.8642	-1.17601	0.333519	0.999997	-5.04149
Zfp37	8.24038	8.3988	1.18818	0.333642	0.999997	-5.02837
Cap1	7.99003	15.8804	1.1879	0.333735	0.999997	-5.02863
Serf2	8.67224	16.7857	1.18638	0.334238	0.999997	-5.02998
Ncbp1	-8.34126	16.7991	-1.18632	0.33426	0.999997	-5.03004
Myo9b	-7.69229	15.59	-1.18464	0.334818	0.999997	-5.03155
Nfkb2	-2.475	5.3792	-1.1779	0.335215	0.999997	-5.03856
Psmd9	8.31869	8.43795	1.1824	0.335563	0.999997	-5.03355
Spag7	-2.40823	5.35008	-1.17545	0.336039	0.999997	-5.04075
Fam120c	4.79959	6.6784	1.17706	0.337352	0.999997	-5.03833
Ahdc1	-7.47836	15.5596	-1.17674	0.337458	0.999997	-5.03861
Vps16	-2.48171	5.40764	-1.16717	0.338845	0.999997	-5.04817
Ttll12	-2.62788	5.48739	-1.16577	0.339319	0.999997	-5.04942
Rbm47	-2.55864	5.4519	-1.16551	0.33941	0.999997	-5.04966
Tmem177	9.36332	17.9018	1.16985	0.339778	0.999997	-5.04477
Ghitm	-2.32564	5.33665	-1.16194	0.340628	0.999997	-5.05285
Esyt1	8.01355	8.28538	1.16659	0.340882	0.999997	-5.04768
Pkn1	-2.39205	5.37685	-1.15989	0.34133	0.999997	-5.05468
Aifm1	9.57159	18.3716	1.16441	0.341622	0.999997	-5.04962
Luc7l3	10.1479	19.1208	1.16312	0.342061	0.999997	-5.05077
C1qtnf1	-8.39673	16.6888	-1.16308	0.342076	0.999997	-5.05081
Thoc3	8.46181	16.6475	1.16223	0.342365	0.999997	-5.05157
Cp	-5.83892	17.6995	-1.16222	0.34237	0.999997	-5.05158
Ppwd1	-2.63058	5.51232	-1.15618	0.342606	0.999997	-5.058
Stxbp3	-0.890603	21.972	-1.14937	0.342666	0.999997	-5.06539
Tab3	-8.07116	8.11781	-1.15998	0.343135	0.999997	-5.05358
Pbdc1	-2.48093	5.43894	-1.15361	0.343493	0.999997	-5.0603
Tex264	-2.47224	5.43439	-1.15356	0.343509	0.999997	-5.06034
Cpsf4	-2.50828	5.45692	-1.15219	0.343981	0.999997	-5.06156
Flnc	8.67617	8.61669	1.15744	0.344004	0.999997	-5.05585
Lpgat1	-2.33239	5.36321	-1.15166	0.344165	0.999997	-5.06203
Emg1	8.93474	17.4904	1.1567	0.344257	0.999997	-5.0565
Dtymk	-4.80123	6.56638	-1.1565	0.344325	0.999997	-5.05668
Csnk2a2	8.66383	16.9883	1.15536	0.344714	0.999997	-5.05769
Pik3cb	-2.45429	5.43591	-1.14877	0.345166	0.999997	-5.06461
Ahctf1	-5.49853	16.9482	-1.15281	0.345592	0.999997	-5.05997
Prpf4	-7.77353	16.0743	-1.15244	0.34572	0.999997	-5.0603
Kars1	-7.98296	16.4959	-1.1512	0.346147	0.999997	-5.0614
Aup1	-7.99271	16.3151	-1.15075	0.346304	0.999997	-5.06181
Tbl3	-5.8774	17.318	-1.15028	0.346465	0.999997	-5.06222
Nudt19	0.999793	20.227	1.13828	0.346551	0.999997	-5.0753
Nob1	-7.47851	15.7731	-1.14692	0.347625	0.999997	-5.06521
Rbm17	8.40665	8.48193	1.14636	0.347821	0.999997	-5.06571
Park7	9.37209	18.1023	1.14573	0.34804	0.999997	-5.06627
Gtf3c1	-7.92264	16.4217	-1.14491	0.348324	0.999997	-5.067
Leng8	8.33888	16.5896	1.14432	0.348527	0.999997	-5.06752
Atxn7l3b	8.91696	17.4545	1.14379	0.348713	0.999997	-5.068
Ilf2	-0.883185	23.1662	-1.13168	0.348886	0.999997	-5.0812
Krt33a;Krt34	-2.31402	5.38521	-1.13731	0.349167	0.999997	-5.07483
Dhcr24	-2.42562	5.44788	-1.1369	0.34931	0.999997	-5.07519
Sigmar1	-9.50267	8.95878	-1.14073	0.349779	0.999997	-5.07072
Got2	-1.27141	20.7538	-1.12813	0.350148	0.999997	-5.08436
Gmppb	-2.25478	5.35972	-1.13387	0.350376	0.999997	-5.07788
Pdap1	6.89252	7.72487	1.13878	0.350459	0.999997	-5.07245
Atxn2l	-6.04305	17.9724	-1.13873	0.350476	0.999997	-5.07249
Espn	-2.47343	5.48392	-1.13278	0.350762	0.999997	-5.07886
Arl1	0.917118	24.2079	1.1259	0.350943	0.999997	-5.08635
Mtch1	10.1982	19.4194	1.13705	0.351065	0.999997	-5.07399
Clpx	-7.95665	16.5111	-1.13689	0.351121	0.999997	-5.07413
Pigt	9.14008	17.7928	1.13687	0.351127	0.999997	-5.07415
Mrpl55	8.90095	17.4931	1.13555	0.351589	0.999997	-5.07532
Snap47	-4.80846	6.66227	-1.13491	0.351814	0.999997	-5.07589
Nomo1	-2.50085	5.50811	-1.12899	0.352103	0.999997	-5.08223
Ccdc115	-2.32097	5.40917	-1.12837	0.352321	0.999997	-5.08278
Sgpl1	8.27174	16.6752	1.13339	0.352349	0.999997	-5.07724
Chek1	-2.24129	5.36492	-1.12803	0.35244	0.999997	-5.08307
Actr2	-8.01902	16.5304	-1.13262	0.352617	0.999997	-5.07792
Ap1b1	-1.03743	21.113	-1.12087	0.352744	0.999997	-5.09082
Znf182	7.65397	15.629	1.1322	0.352765	0.999997	-5.07829
Mrps12	9.54494	18.4916	1.13153	0.353002	0.999997	-5.07888
Nadk	9.97123	9.26422	1.13101	0.353186	0.999997	-5.07935
Mrpl53	9.88566	9.22144	1.131	0.353187	0.999997	-5.07935
Arhgef9	9.85027	9.20374	1.131	0.353188	0.999997	-5.07935
Ddx42	9.62019	9.0887	1.13099	0.353192	0.999997	-5.07936
Selenof	9.56856	9.06289	1.13099	0.353193	0.999997	-5.07937
Gcat	9.55948	9.05835	1.13099	0.353193	0.999997	-5.07937
Zfp809	9.55861	9.05791	1.13099	0.353193	0.999997	-5.07937
Trim68	9.47468	9.01595	1.13098	0.353195	0.999997	-5.07937
Abhd16a	9.44415	9.00068	1.13098	0.353196	0.999997	-5.07937
Elavl2;Elavl4	9.43234	8.99478	1.13098	0.353196	0.999997	-5.07937
Slc66a3	9.4221	8.98966	1.13098	0.353197	0.999997	-5.07938
Acot1	9.39874	8.97798	1.13097	0.353197	0.999997	-5.07938
S100pbp	9.38769	8.97245	1.13097	0.353197	0.999997	-5.07938
Srp9	9.37855	8.96788	1.13097	0.353198	0.999997	-5.07938
Psmd6	9.31307	8.93514	1.13097	0.3532	0.999997	-5.07938
Bri3bp	9.29055	8.92388	1.13097	0.3532	0.999997	-5.07938
Higd1a	9.25223	8.90472	1.13096	0.353201	0.999997	-5.07939
Cs	9.22951	8.89336	1.13096	0.353202	0.999997	-5.07939
Iqgap2	9.22809	8.89265	1.13096	0.353202	0.999997	-5.07939
Bckdk	9.2264	8.89181	1.13096	0.353202	0.999997	-5.07939
Echdc1	9.2126	8.88491	1.13096	0.353203	0.999997	-5.07939
Lage3	9.17278	8.865	1.13096	0.353204	0.999997	-5.07939
Znf664	9.15559	8.8564	1.13095	0.353205	0.999997	-5.0794
Trim47	9.14357	8.85039	1.13095	0.353205	0.999997	-5.0794
Phpt1	9.14071	8.84896	1.13095	0.353205	0.999997	-5.0794
Tbp;Tbpl2	9.12323	8.84022	1.13095	0.353206	0.999997	-5.0794
Dpy19l2	9.07641	8.81681	1.13095	0.353207	0.999997	-5.0794
Gapvd1	9.04698	8.8021	1.13094	0.353208	0.999997	-5.07941
Papss1	9.02884	8.79303	1.13094	0.353209	0.999997	-5.07941
Bccip	9.00428	8.78075	1.13094	0.35321	0.999997	-5.07941
Cask	8.96042	8.75882	1.13093	0.353212	0.999997	-5.07941
Srsf9	8.89146	8.72434	1.13092	0.353215	0.999997	-5.07942
Spp1	8.87499	8.7161	1.13092	0.353215	0.999997	-5.07942
Rac1;Rac2;Rac3	8.86466	8.71094	1.13092	0.353216	0.999997	-5.07942
Pmvk	8.85917	8.70819	1.13092	0.353216	0.999997	-5.07943
Sc5d	8.85177	8.70449	1.13092	0.353217	0.999997	-5.07943
Uba2	8.83693	8.69707	1.13092	0.353217	0.999997	-5.07943
Pced1b	8.82729	8.69225	1.13092	0.353218	0.999997	-5.07943
Set	8.8184	8.68781	1.13092	0.353218	0.999997	-5.07943
Wtap	8.81722	8.68722	1.13091	0.353218	0.999997	-5.07943
Acad8	8.81404	8.68563	1.13091	0.353218	0.999997	-5.07943
Mrpl54	8.79712	8.67717	1.13091	0.353219	0.999997	-5.07943
Tmed1	8.76715	8.66218	1.13091	0.353221	0.999997	-5.07944
Krt4	8.7261	8.64166	1.1309	0.353223	0.999997	-5.07944
Cerk;mt-Co3	8.70171	8.62946	1.1309	0.353224	0.999997	-5.07944
Pard3	8.65739	8.6073	1.13089	0.353226	0.999997	-5.07945
Anp32b	8.64954	8.60338	1.13089	0.353227	0.999997	-5.07945
Trim28	8.63891	8.59806	1.13089	0.353227	0.999997	-5.07945
Magoh	8.61489	8.58605	1.13089	0.353228	0.999997	-5.07946
Tmed2	8.59724	8.57723	1.13088	0.353229	0.999997	-5.07946
Atg2a	8.57657	8.56689	1.13088	0.353231	0.999997	-5.07946
U2surp	8.56352	8.56037	1.13088	0.353231	0.999997	-5.07946
Grhpr	8.56055	8.55888	1.13088	0.353232	0.999997	-5.07946
Mbp	8.5576	8.55741	1.13088	0.353232	0.999997	-5.07946
Uprt	8.55393	8.55557	1.13088	0.353232	0.999997	-5.07946
St13	8.52876	8.54299	1.13087	0.353233	0.999997	-5.07947
Pter	8.48506	8.52114	1.13086	0.353236	0.999997	-5.07948
Pdlim1	8.48274	8.51998	1.13086	0.353236	0.999997	-5.07948
Snw1	8.47586	8.51654	1.13086	0.353237	0.999997	-5.07948
Krt35	8.46482	8.51101	1.13086	0.353237	0.999997	-5.07948
Znf728	8.46334	8.51028	1.13086	0.353237	0.999997	-5.07948
Hnrnpdl	8.45276	8.50499	1.13086	0.353238	0.999997	-5.07948
Srprb	8.42177	8.48949	1.13085	0.35324	0.999997	-5.07949
Znf474	8.41811	8.48766	1.13085	0.35324	0.999997	-5.07949
Wdr45b	8.41667	8.48694	1.13085	0.35324	0.999997	-5.07949
Dcaf7	8.4097	8.48346	1.13085	0.353241	0.999997	-5.07949
Uchl5	8.40867	8.48294	1.13085	0.353241	0.999997	-5.07949
Csnk2b	8.40782	8.48252	1.13085	0.353241	0.999997	-5.07949
Arpc5	8.3981	8.47766	1.13085	0.353242	0.999997	-5.07949
Wdr13	8.39595	8.47658	1.13085	0.353242	0.999997	-5.07949
Znf436	8.39031	8.47376	1.13085	0.353242	0.999997	-5.07949
Uck2	8.38924	8.47323	1.13085	0.353242	0.999997	-5.07949
Etfa	8.36588	8.46155	1.13084	0.353244	0.999997	-5.07949
Csnk1g2;Csnk1g3	8.35905	8.45813	1.13084	0.353244	0.999997	-5.0795
Exosc10	8.3574	8.45731	1.13084	0.353244	0.999997	-5.0795
Snx6	8.34645	8.45183	1.13084	0.353245	0.999997	-5.0795
Gtf2f2	8.34401	8.45061	1.13084	0.353245	0.999997	-5.0795
Dyrk1a	8.34274	8.44998	1.13084	0.353245	0.999997	-5.0795
Gclm	8.34127	8.44924	1.13084	0.353245	0.999997	-5.0795
Rhog	8.33651	8.44686	1.13084	0.353246	0.999997	-5.0795
Lsm8	8.32279	8.44	1.13083	0.353247	0.999997	-5.0795
Nsun4	8.29544	8.42633	1.13083	0.353249	0.999997	-5.07951
Acadvl	8.27935	8.41828	1.13083	0.35325	0.999997	-5.07951
Tsnax	8.27498	8.4161	1.13082	0.35325	0.999997	-5.07951
Cox4i1	8.26883	8.41302	1.13082	0.353251	0.999997	-5.07951
Pgrmc1	8.22618	8.3917	1.13081	0.353254	0.999997	-5.07952
Rragd	8.22363	8.39042	1.13081	0.353254	0.999997	-5.07952
Ptrhd1	8.2162	8.38671	1.13081	0.353254	0.999997	-5.07952
Arl4c	8.21173	8.38447	1.13081	0.353255	0.999997	-5.07952
Dctn2	8.19291	8.37506	1.13081	0.353256	0.999997	-5.07953
Zfp26	8.1856	8.37141	1.13081	0.353257	0.999997	-5.07953
Mfsd10	8.18434	8.37078	1.1308	0.353257	0.999997	-5.07953
Msrb3	8.16993	8.36357	1.1308	0.353258	0.999997	-5.07953
Znf787	8.1618	8.35951	1.1308	0.353259	0.999997	-5.07953
Psen1;Psen2	8.15015	8.35368	1.1308	0.35326	0.999997	-5.07953
Vill	8.14296	8.35009	1.1308	0.35326	0.999997	-5.07954
Ikbkb	8.13406	8.34564	1.13079	0.353261	0.999997	-5.07954
Cept1	8.13012	8.34367	1.13079	0.353261	0.999997	-5.07954
Rit1	8.10343	8.33032	1.13079	0.353263	0.999997	-5.07954
Cbr2	8.08541	8.32131	1.13078	0.353265	0.999997	-5.07955
Cdc37	8.07989	8.31855	1.13078	0.353265	0.999997	-5.07955
Pin1	8.07826	8.31774	1.13078	0.353266	0.999997	-5.07955
Stmn2	8.07327	8.31524	1.13078	0.353266	0.999997	-5.07955
Gga3	8.06145	8.30933	1.13078	0.353267	0.999997	-5.07955
Gstt1	8.05646	8.30684	1.13078	0.353267	0.999997	-5.07955
Itpa	8.05363	8.30542	1.13077	0.353268	0.999997	-5.07955
Ube2k	8.0509	8.30406	1.13077	0.353268	0.999997	-5.07956
Exosc5	8.02932	8.29327	1.13077	0.35327	0.999997	-5.07956
Casp8	8.01206	8.28464	1.13076	0.353271	0.999997	-5.07956
Mrpl22	8.00186	8.27954	1.13076	0.353272	0.999997	-5.07957
Abi1	7.93757	8.24739	1.13074	0.353278	0.999997	-5.07958
Ctsa	7.9288	8.24301	1.13074	0.353279	0.999997	-5.07958
Gfm2	7.92753	8.24237	1.13074	0.353279	0.999997	-5.07958
Map2k6	7.91742	8.23732	1.13074	0.35328	0.999997	-5.07959
Pycr3	7.90883	8.23302	1.13074	0.353281	0.999997	-5.07959
Chpt1	7.89182	8.22452	1.13073	0.353282	0.999997	-5.07959
Cyp20a1	7.88871	8.22296	1.13073	0.353283	0.999997	-5.07959
Tbrg4	7.88716	8.22219	1.13073	0.353283	0.999997	-5.07959
Cops5	7.87911	8.21816	1.13073	0.353284	0.999997	-5.07959
Zkscan5	7.87277	8.21499	1.13073	0.353284	0.999997	-5.0796
Ugp2	7.87041	8.21381	1.13073	0.353284	0.999997	-5.0796
Adamts4	7.8546	8.20591	1.13072	0.353286	0.999997	-5.0796
Pdxdc1	7.83016	8.19369	1.13072	0.353289	0.999997	-5.07961
Chek2	7.82655	8.19188	1.13071	0.353289	0.999997	-5.07961
Septin2	7.79401	8.17561	1.1307	0.353292	0.999997	-5.07962
Sema4c	7.78373	8.17047	1.1307	0.353293	0.999997	-5.07962
Krcc1	7.76683	8.16202	1.1307	0.353295	0.999997	-5.07962
Akap8l	7.76061	8.15891	1.13069	0.353296	0.999997	-5.07963
Exoc2	7.75409	8.15565	1.13069	0.353296	0.999997	-5.07963
Rab33a;Rab33b	7.75183	8.15452	1.13069	0.353297	0.999997	-5.07963
Upp1	7.73903	8.14812	1.13069	0.353298	0.999997	-5.07963
Gda	7.72903	8.14312	1.13068	0.353299	0.999997	-5.07963
Mrps30	7.71402	8.13562	1.13068	0.353301	0.999997	-5.07964
Hat1	7.69507	8.12614	1.13067	0.353303	0.999997	-5.07964
Eri1	7.69249	8.12485	1.13067	0.353303	0.999997	-5.07964
Pon2	7.67654	8.11687	1.13067	0.353305	0.999997	-5.07965
Stat5a	7.64546	8.10134	1.13066	0.353309	0.999997	-5.07966
Mapre1	7.63382	8.09552	1.13065	0.35331	0.999997	-5.07966
Frmd8	7.63201	8.09461	1.13065	0.35331	0.999997	-5.07966
Mars2	7.62193	8.08957	1.13065	0.353311	0.999997	-5.07966
Vps36	7.5999	8.07856	1.13064	0.353314	0.999997	-5.07967
Cryz	7.59741	8.07731	1.13064	0.353314	0.999997	-5.07967
Elovl7	7.59485	8.07603	1.13064	0.353315	0.999997	-5.07967
Tmed4	7.58592	8.07157	1.13064	0.353316	0.999997	-5.07968
Atp6v1b1	7.58128	8.06925	1.13064	0.353316	0.999997	-5.07968
Gstz1	7.5494	8.05331	1.13063	0.35332	0.999997	-5.07969
Glrx5	7.52686	8.04204	1.13062	0.353323	0.999997	-5.07969
Tm9sf2	7.50128	8.02925	1.13061	0.353326	0.999997	-5.0797
Hbb-b1;Hbb-b2	7.49343	8.02532	1.13061	0.353327	0.999997	-5.0797
Fga	7.49216	8.02469	1.1306	0.353327	0.999997	-5.0797
Rb1	7.46886	8.01304	1.1306	0.35333	0.999997	-5.07971
Itgb6	7.46479	8.011	1.13059	0.353331	0.999997	-5.07971
Ptk2;Ptk2b	7.45466	8.00594	1.13059	0.353332	0.999997	-5.07972
Larp4b	7.4508	8.00401	1.13059	0.353333	0.999997	-5.07972
Endog	7.44195	7.99958	1.13059	0.353334	0.999997	-5.07972
Pisd	7.42359	7.9904	1.13058	0.353336	0.999997	-5.07973
Mrps18a	7.41651	7.98686	1.13058	0.353337	0.999997	-5.07973
Atp2c1	7.41029	7.98375	1.13057	0.353338	0.999997	-5.07973
Nif3l1	7.39682	7.97702	1.13057	0.35334	0.999997	-5.07974
Ak3	7.39088	7.97405	1.13057	0.353341	0.999997	-5.07974
Asf1a;Asf1b	7.38502	7.97112	1.13056	0.353342	0.999997	-5.07974
Agpat5	7.35962	7.95842	1.13055	0.353345	0.999997	-5.07975
Ndc1	7.35427	7.95574	1.13055	0.353346	0.999997	-5.07975
Pithd1	7.33166	7.94444	1.13054	0.353349	0.999997	-5.07976
Ldhd	7.28641	7.92181	1.13052	0.353356	0.999997	-5.07978
Mtch2	8.93945	17.5931	1.13047	0.353373	0.999997	-5.07982
Nat2	7.15629	7.85675	1.13047	0.353376	0.999997	-5.07983
Irgm1	7.14717	7.85219	1.13046	0.353378	0.999997	-5.07983
Pdhx	7.11614	7.83668	1.13045	0.353383	0.999997	-5.07985
Ddah2	7.0208	7.78901	1.1304	0.3534	0.999997	-5.07989
Ppat	6.99742	7.77732	1.13039	0.353404	0.999997	-5.0799
Rap1gds1	-7.98429	8.17714	-1.13038	0.353406	0.999997	-5.0799
Xrn1	6.96912	7.76317	1.13037	0.353409	0.999997	-5.07991
Fads2	6.91939	7.7383	1.13035	0.353419	0.999997	-5.07993
Igf2r	6.59374	7.57548	1.13015	0.353489	0.999997	-5.08011
Cpd	-4.70229	6.63045	-1.12976	0.353626	0.999997	-5.08046
Ppp6r3	-7.00983	7.7998	-1.12951	0.353714	0.999997	-5.08068
Raf1	4.83684	6.69703	1.12773	0.354343	0.999997	-5.08226
Esyt3	4.83411	6.69566	1.12772	0.354346	0.999997	-5.08226
Tpm3	4.83283	6.69502	1.12772	0.354347	0.999997	-5.08227
Yipf5	4.81849	6.68785	1.12768	0.35436	0.999997	-5.0823
Ormdl2	4.81614	6.68668	1.12767	0.354362	0.999997	-5.0823
Tra2b	8.05718	16.291	1.12764	0.354373	0.999997	-5.08233
Setd1a	4.80257	6.67989	1.12764	0.354374	0.999997	-5.08233
Rpa3	4.70849	6.63285	1.12739	0.354461	0.999997	-5.08255
Fkbp1a	-7.34858	7.98456	-1.12736	0.354474	0.999997	-5.08258
Akt1	4.67096	6.61409	1.12729	0.354498	0.999997	-5.08265
Dnajc8	4.66846	6.61284	1.12728	0.354501	0.999997	-5.08265
Cox6c	-2.39575	5.46543	-1.12218	0.354522	0.999997	-5.08827
Srp68	8.60458	17.1195	1.12701	0.354597	0.999997	-5.08289
Vrk2	4.26243	6.40982	1.12592	0.354982	0.999997	-5.08386
Hsp90b1	-0.83826	25.0202	-1.11427	0.35512	0.999997	-5.09669
Mmp14	-6.93193	7.78708	-1.12523	0.355228	0.999997	-5.08447
Pgm2	-7.44784	8.05008	-1.12505	0.35529	0.999997	-5.08463
Ifitm2	-8.06382	8.36325	-1.12494	0.355331	0.999997	-5.08473
Ankrd17	-7.60709	8.13181	-1.12491	0.355339	0.999997	-5.08475
Cactin	7.69537	15.7711	1.12282	0.356082	0.999997	-5.0866
Lancl1	-6.90656	7.7908	-1.12255	0.356179	0.999997	-5.08685
Ncstn	-6.71813	7.59145	-1.122	0.356373	0.999997	-5.08733
Fanci	2.54513	5.55117	1.11687	0.356423	0.999997	-5.09298
Capn5	-9.57229	14.3944	-1.12183	0.356435	0.999997	-5.08748
Usp4	2.53941	5.54831	1.11672	0.356475	0.999997	-5.09311
Stk11ip	2.53898	5.5481	1.11671	0.356479	0.999997	-5.09312
Cops8	2.53598	5.5466	1.11663	0.356507	0.999997	-5.09319
Sorbs2	2.53383	5.54552	1.11658	0.356527	0.999997	-5.09324
Map3k20	7.94418	16.1423	1.12155	0.356534	0.999997	-5.08773
Lgalsl	2.52829	5.54275	1.11644	0.356578	0.999997	-5.09336
Sil1	2.52496	5.54109	1.11635	0.356609	0.999997	-5.09344
Rab12	2.51917	5.53819	1.1162	0.356663	0.999997	-5.09358
Sh3yl1	2.51741	5.53731	1.11615	0.35668	0.999997	-5.09362
Cog3	2.51528	5.53625	1.1161	0.3567	0.999997	-5.09367
Cog5	-2.43086	5.49966	-1.11603	0.356723	0.999997	-5.09372
Oaf	2.50669	5.53195	1.11587	0.356782	0.999997	-5.09387
Csrp2	2.50609	5.53165	1.11585	0.356787	0.999997	-5.09388
Ogdh	-7.51156	15.9354	-1.12079	0.356805	0.999997	-5.0884
Tnfaip2	-2.53902	5.56137	-1.11578	0.356813	0.999997	-5.09394
Cand2	2.50105	5.52913	1.11572	0.356836	0.999997	-5.094
Cdkn2a	2.49844	5.52783	1.11565	0.356861	0.999997	-5.09406
Fblim1	2.49789	5.52755	1.11563	0.356866	0.999997	-5.09408
Ptpmt1	2.49603	5.52662	1.11558	0.356884	0.999997	-5.09412
Nme3	-5.03989	16.8378	-1.12056	0.356885	0.999997	-5.0886
Tjp2	-2.42652	5.49859	-1.11544	0.356935	0.999997	-5.09424
Ei24	2.49016	5.52369	1.11542	0.356941	0.999997	-5.09426
Fxr2	2.48961	5.52341	1.11541	0.356947	0.999997	-5.09427
Cmpk2	2.48638	5.5218	1.11532	0.356978	0.999997	-5.09435
Eif5	2.48545	5.52133	1.1153	0.356987	0.999997	-5.09437
Hpf1	2.48413	5.52067	1.11526	0.357	0.999997	-5.09441
Alg10b	2.4839	5.52056	1.11525	0.357003	0.999997	-5.09441
Sh3pxd2b	-2.52308	5.55385	-1.11519	0.357027	0.999997	-5.09447
Dgka	2.47796	5.51759	1.11509	0.357061	0.999997	-5.09456
Nt5c2	2.47582	5.51652	1.11503	0.357082	0.999997	-5.09461
Ggt7	2.47462	5.51592	1.115	0.357094	0.999997	-5.09464
Ssb	8.64172	17.2278	1.11995	0.357103	0.999997	-5.08914
Gpn3	-2.46719	5.52279	-1.11496	0.357107	0.999997	-5.09467
Znf667	2.46771	5.51246	1.11481	0.357164	0.999997	-5.09481
Dnajb4	2.45552	5.50637	1.11446	0.357287	0.999997	-5.09511
Ptgr2	2.4473	5.50226	1.11423	0.357371	0.999997	-5.09532
Akr1a1	2.44314	5.50018	1.11411	0.357414	0.999997	-5.09543
Psme2	2.43672	5.49697	1.11392	0.357481	0.999997	-5.09559
Dip2b	-2.45865	5.52081	-1.11377	0.357538	0.999997	-5.09573
Eml2	2.43117	5.49419	1.11376	0.357539	0.999997	-5.09573
Znf445	2.42793	5.49257	1.11367	0.357573	0.999997	-5.09582
Ubap2	-7.20439	7.96813	-1.11862	0.357577	0.999997	-5.09032
Clpp	2.42714	5.49218	1.11364	0.357582	0.999997	-5.09584
Ndufa12	-2.37873	5.47619	-1.11338	0.357677	0.999997	-5.09607
Aak1	-7.5798	8.16282	-1.11832	0.357686	0.999997	-5.09059
Tial1	2.41596	5.48659	1.11331	0.357701	0.999997	-5.09613
Bles03	-7.95035	16.2837	-1.11823	0.357716	0.999997	-5.09066
Wdr12	-2.4114	5.49515	-1.11325	0.357725	0.999997	-5.09619
Timm44	2.41256	5.48489	1.11321	0.357737	0.999997	-5.09622
Ahr	2.40016	5.47869	1.11284	0.357872	0.999997	-5.09655
Ptms	2.39971	5.47846	1.11282	0.357877	0.999997	-5.09656
Sec23ip	-7.6961	8.22711	-1.11765	0.357923	0.999997	-5.09118
Oxa1l	2.39362	5.47542	1.11264	0.357944	0.999997	-5.09673
Dsg1a;Dsg1b;Dsg1c	-7.87718	8.32232	-1.11734	0.358035	0.999997	-5.09145
Nup50	2.38512	5.47117	1.11238	0.358038	0.999997	-5.09696
Yrdc	2.37939	5.4683	1.1122	0.358103	0.999997	-5.09712
Gpd2	8.67752	17.2537	1.11712	0.358112	0.999997	-5.09164
Eif4e	8.97118	17.7499	1.11709	0.358124	0.999997	-5.09167
Glg1	-2.37902	5.47952	-1.11202	0.358168	0.999997	-5.09728
Keap1	2.37312	5.46517	1.112	0.358174	0.999997	-5.09729
Cd44	-7.48768	8.1271	-1.1166	0.358298	0.999997	-5.09211
Lta4h	-7.72626	8.25	-1.11659	0.358304	0.999997	-5.09212
Lsm7	8.04706	8.30214	1.11648	0.358344	0.999997	-5.09222
Med10	2.35741	5.45731	1.1115	0.358354	0.999997	-5.09773
Ap4s1	-2.27279	5.41993	-1.11135	0.358409	0.999997	-5.09787
Hal	-7.7073	8.24389	-1.11606	0.358491	0.999997	-5.09258
Chmp2a	-7.52519	8.1503	-1.11603	0.358503	0.999997	-5.09261
Fmr1	8.80857	17.5887	1.11575	0.358604	0.999997	-5.09286
Sltm	8.3151	16.8592	1.1157	0.358622	0.999997	-5.0929
Smg7	-2.37187	5.47852	-1.11068	0.358649	0.999997	-5.09846
P4ha1	-7.59592	8.19076	-1.11544	0.358713	0.999997	-5.09313
Arhgef40	-7.59826	8.19234	-1.11539	0.358732	0.999997	-5.09318
Rps19	-1.57419	20.2867	-1.10697	0.358849	0.999997	-5.10247
Poc1a	-8.07927	8.44285	-1.11504	0.358857	0.999997	-5.09349
Sgpp1	-7.40824	8.09885	-1.11471	0.358975	0.999997	-5.09378
Ppp1r7	-7.8028	8.30412	-1.11449	0.359053	0.999997	-5.09397
Naa50	2.28573	5.42147	1.10909	0.359225	0.999997	-5.09987
Mrps27	8.44586	16.9774	1.1139	0.359266	0.999997	-5.09449
Adsl	-7.74872	8.28233	-1.11362	0.359368	0.999997	-5.09475
Plod3	-8.58165	17.2572	-1.11338	0.359453	0.999997	-5.09496
Pigs	7.85551	16.054	1.11315	0.359535	0.999997	-5.09516
Slc3a2	2.2583	5.40776	1.1081	0.359582	0.999997	-5.10074
Setd3	-4.76537	6.73534	-1.11294	0.359612	0.999997	-5.09535
Acy1	2.25157	5.40439	1.10786	0.359672	0.999997	-5.10096
Nup43	2.25055	5.40388	1.10782	0.359685	0.999997	-5.10099
Ceacam10	-2.34408	5.46929	-1.10775	0.359709	0.999997	-5.10105
Nop10	2.24869	5.40295	1.10775	0.35971	0.999997	-5.10105
Pkp3	2.24549	5.40135	1.10763	0.359753	0.999997	-5.10116
Basp1	-6.98288	7.89345	-1.11243	0.359794	0.999997	-5.0958
Rab3d	-7.96247	8.40407	-1.11206	0.359927	0.999997	-5.09612
Ttc39b	-8.05453	8.45327	-1.11186	0.36	0.999997	-5.0963
Cluh	-4.68833	6.70023	-1.11171	0.360053	0.999997	-5.09643
Oxct1	-7.39581	8.11288	-1.11165	0.360072	0.999997	-5.09648
Gas6	-2.32323	5.45954	-1.10675	0.360074	0.999997	-5.10194
Arhgef1	-7.60788	8.22335	-1.1116	0.360091	0.999997	-5.09653
Canx	-8.94967	17.7624	-1.11135	0.360182	0.999997	-5.09675
Scamp3	-7.64384	8.14195	-1.11086	0.360358	0.999997	-5.09718
Foxk2	-7.10533	7.97181	-1.11013	0.360621	0.999997	-5.09783
Tm9sf4	-8.68115	8.68751	-1.11001	0.360663	0.999997	-5.09793
Kdsr	2.1791	5.36816	1.10505	0.360691	0.999997	-5.10344
Pxdn	-2.23096	5.40966	-1.10504	0.360694	0.999997	-5.10345
Atp6v0d1	-2.43279	5.52706	-1.10493	0.360734	0.999997	-5.10355
Endod1	-6.95046	7.89665	-1.10925	0.360937	0.999997	-5.0986
Snu13	-8.08032	8.48612	-1.10919	0.360958	0.999997	-5.09865
Syngr1	-8.0547	8.47277	-1.10919	0.360958	0.999997	-5.09865
Map4k4	-4.71809	6.72745	-1.10903	0.361017	0.999997	-5.0988
Emc2	-7.50348	8.18864	-1.10874	0.361122	0.999997	-5.09905
Exosc6	-7.35929	8.11348	-1.10872	0.361128	0.999997	-5.09907
Rnpep	-7.15524	8.0078	-1.10859	0.361175	0.999997	-5.09918
Trnt1	-7.26208	8.06506	-1.10837	0.361254	0.999997	-5.09938
Dnajc7	-4.6226	6.6811	-1.10807	0.361362	0.999997	-5.09964
Atp5me	-2.45324	5.54368	-1.10291	0.361469	0.999997	-5.10534
Yme1l1	-7.53519	8.21206	-1.10773	0.361485	0.999997	-5.09994
Alg2	-4.55609	6.64746	-1.1077	0.361495	0.999997	-5.09997
Pdcd6	8.76921	17.5205	1.10759	0.361535	0.999997	-5.10006
Fkbp4	-7.1278	8.00036	-1.10753	0.361559	0.999997	-5.10012
Babam2	-8.19448	8.55928	-1.10735	0.361622	0.999997	-5.10028
Ppip5k2	8.10002	8.32862	1.10719	0.36168	0.999997	-5.10042
Acyp2	-6.74518	7.80234	-1.10715	0.361694	0.999997	-5.10045
Pbk	2.11428	5.33575	1.10229	0.361695	0.999997	-5.10588
Knop1	-7.81165	8.36265	-1.10687	0.361797	0.999997	-5.1007
Fkbp2	-7.35193	8.12254	-1.10679	0.361824	0.999997	-5.10077
Apoa1	-9.44624	9.11313	-1.10676	0.361835	0.999997	-5.1008
Fads3	-7.68381	8.29662	-1.10675	0.361841	0.999997	-5.10081
Plod1	-7.72713	8.31943	-1.10673	0.361848	0.999997	-5.10083
Rab3gap2	-7.36623	8.13121	-1.10662	0.361888	0.999997	-5.10093
Mmaa	-7.48827	8.1978	-1.10622	0.36203	0.999997	-5.10127
Stub1	-7.3899	8.14633	-1.10621	0.362034	0.999997	-5.10128
Tubal3	-2.14635	5.36802	-1.10128	0.362063	0.999997	-5.10677
Nccrp1	-2.47302	5.56002	-1.10086	0.362214	0.999997	-5.10714
Hnrnpa0	9.41516	18.6296	1.10546	0.362308	0.999997	-5.10195
Igsf8	-2.43753	5.54081	-1.10031	0.362416	0.999997	-5.10763
Parva	8.02418	16.4011	1.10493	0.362499	0.999997	-5.10242
Dock9	-7.75162	8.34568	-1.10482	0.362537	0.999997	-5.10251
Chpf	-7.67228	8.19944	-1.10481	0.36254	0.999997	-5.10252
Cat	-7.31664	8.11903	-1.10455	0.362637	0.999997	-5.10275
Egln1	-2.4028	5.52234	-1.0996	0.362675	0.999997	-5.10825
Krt23	-7.80371	8.37958	-1.1039	0.362871	0.999997	-5.10332
Srrm1	-7.63999	8.29408	-1.10381	0.362902	0.999997	-5.1034
Stxbp2	-7.5576	8.25227	-1.10359	0.362983	0.999997	-5.10359
Pepd	-7.28487	8.11034	-1.10334	0.363073	0.999997	-5.10382
Cyp51a1	-7.89892	8.43406	-1.10329	0.363093	0.999997	-5.10386
Mthfd2	-8.57387	17.3553	-1.10315	0.363142	0.999997	-5.10398
Sart3	-7.82173	8.39481	-1.10309	0.363163	0.999997	-5.10403
Lpcat2	-7.08614	8.00762	-1.10303	0.363186	0.999997	-5.10409
Arpc2	8.25305	16.7662	1.10297	0.363208	0.999997	-5.10414
Elac2	-7.80876	8.3899	-1.10283	0.36326	0.999997	-5.10427
Fah	-7.65351	8.3083	-1.1028	0.363271	0.999997	-5.1043
Rad23b	-7.41857	8.18483	-1.10274	0.36329	0.999997	-5.10434
Bzw1	8.72358	17.4904	1.10267	0.363317	0.999997	-5.10441
Mavs	-2.40552	5.52876	-1.09756	0.363422	0.999997	-5.11006
Nudc	-7.83949	8.4094	-1.10236	0.363428	0.999997	-5.10468
Ssbp1	-8.68105	8.85387	-1.10223	0.363478	0.999997	-5.1048
Mal2	-6.74096	7.83282	-1.10184	0.363617	0.999997	-5.10514
Brd7	-7.62405	8.30023	-1.10173	0.363659	0.999997	-5.10524
Smad2	-7.42141	8.19515	-1.10144	0.363763	0.999997	-5.10549
Gnpda1	-7.44539	8.21139	-1.10092	0.363953	0.999997	-5.10595
Sugt1	-7.18761	8.07513	-1.1009	0.36396	0.999997	-5.10597
Oplah	-2.31304	5.47811	-1.09605	0.363975	0.999997	-5.11139
Eps8l1	-6.93936	7.94405	-1.10085	0.363978	0.999997	-5.10601
Cwf19l1	-7.41379	8.19521	-1.10084	0.363982	0.999997	-5.10602
Ak1	-7.7726	8.38627	-1.10065	0.364049	0.999997	-5.10618
Pacs1	-7.47574	8.23067	-1.10045	0.364125	0.999997	-5.10637
Nsfl1c	-7.48319	8.23611	-1.10023	0.364204	0.999997	-5.10656
Dennd11	-4.33591	6.56076	-1.10022	0.364207	0.999997	-5.10657
Uhrf1	-7.49256	8.24115	-1.10022	0.364208	0.999997	-5.10657
Sra1	-4.71855	6.76621	-1.10017	0.364226	0.999997	-5.10661
Nap1l1	-7.27617	8.1285	-1.09992	0.364315	0.999997	-5.10683
Pcmtd2	-7.5166	8.25664	-1.09981	0.364355	0.999997	-5.10692
Ecpas	-7.66179	8.3343	-1.09971	0.364393	0.999997	-5.10702
Psmb10	-6.96713	7.96672	-1.0996	0.364432	0.999997	-5.10711
Dnajb1	-7.84429	8.43196	-1.09957	0.364444	0.999997	-5.10714
Copz1	-7.57859	8.29141	-1.09954	0.364455	0.999997	-5.10717
Gps1	-7.5957	8.30194	-1.09933	0.364532	0.999997	-5.10735
Spty2d1	-7.27239	8.13134	-1.0992	0.364579	0.999997	-5.10747
Tpd52l2	-2.46196	5.56928	-1.09438	0.364587	0.999997	-5.11286
Uba1	-1.164	23.0674	-1.08819	0.364674	0.999997	-5.11977
Med20	-7.45755	8.23168	-1.09889	0.364692	0.999997	-5.10774
Rbm25	-7.68009	16.3872	-1.09876	0.364739	0.999997	-5.10785
Stxbp1	-7.65394	8.33718	-1.0987	0.364759	0.999997	-5.1079
Efl1	-7.54144	8.27767	-1.09868	0.364769	0.999997	-5.10793
Nck1	-7.19137	8.09216	-1.09862	0.36479	0.999997	-5.10798
Myh14	-8.01499	8.52957	-1.09859	0.364801	0.999997	-5.108
Snrpg	-4.45366	6.63115	-1.09849	0.364837	0.999997	-5.10809
Pcbp3	-7.0359	8.01116	-1.09837	0.364881	0.999997	-5.1082
Ap1g2	-7.56789	8.29398	-1.09835	0.364888	0.999997	-5.10821
Prkaca	-7.15907	8.0769	-1.09833	0.364895	0.999997	-5.10823
Glod4	-7.17682	8.08639	-1.09832	0.364898	0.999997	-5.10824
Prxl2b	-7.74884	8.28635	-1.0983	0.364905	0.999997	-5.10825
Rad50	-7.41107	16.0086	-1.09829	0.364908	0.999997	-5.10826
Psmb6	-8.88354	17.8673	-1.09827	0.364916	0.999997	-5.10828
Bsg	-7.7938	8.41634	-1.09801	0.365011	0.999997	-5.10851
Psmd11	-0.95442	22.1636	-1.08675	0.365208	0.999997	-5.12104
Sms	-7.74161	8.39324	-1.09736	0.365248	0.999997	-5.10908
Tnc	-7.56079	8.29968	-1.09698	0.365386	0.999997	-5.10942
Abcc1	-4.65181	6.74446	-1.09692	0.365408	0.999997	-5.10947
Pds5a	-7.27006	15.7814	-1.09691	0.365412	0.999997	-5.10948
Snrpa	-7.58104	8.31133	-1.09686	0.365431	0.999997	-5.10953
Rock1	-7.69771	8.37434	-1.09673	0.365478	0.999997	-5.10964
Pelp1	-7.7146	8.38383	-1.09666	0.365504	0.999997	-5.1097
Tmx3	8.20087	16.7003	1.09647	0.365574	0.999997	-5.10987
Chmp3	-2.44976	5.56872	-1.09167	0.365585	0.999997	-5.11525
Gss	-7.13279	8.07715	-1.09616	0.365687	0.999997	-5.11014
Pak1	-7.43926	8.24181	-1.09599	0.365751	0.999997	-5.1103
Ak2	-0.834247	23.3163	-1.08495	0.365879	0.999997	-5.12262
Lgals9	-7.2199	8.12863	-1.09541	0.365963	0.999997	-5.11081
Washc5	-2.42604	5.55761	-1.09049	0.366017	0.999997	-5.11628
Wdr82	-7.51526	16.2064	-1.09473	0.366211	0.999997	-5.1114
Naa30	-7.47381	16.0144	-1.09465	0.36624	0.999997	-5.11147
Septin11	-7.74787	16.3351	-1.09438	0.366336	0.999997	-5.1117
Plekhh3	-2.2664	5.46551	-1.08947	0.366395	0.999997	-5.11718
Cnot1	-7.83581	16.5577	-1.09388	0.366521	0.999997	-5.11215
Lman2l	-6.88052	7.9598	-1.09343	0.366684	0.999997	-5.11254
Cul5	-4.66158	6.76927	-1.09242	0.367057	0.999997	-5.11344
Wars1	6.32343	18.9842	1.09139	0.367434	0.999997	-5.11434
Dnaja3	-4.32709	6.5978	-1.08987	0.367992	0.999997	-5.11567
Gja1	-2.38779	5.54838	-1.08489	0.368089	0.999997	-5.12121
Ifrd1	-5.06452	17.036	-1.08942	0.368158	0.999997	-5.11607
Noc2l	-8.64002	17.6816	-1.08941	0.36816	0.999997	-5.11607
Ufm1	-7.93088	8.45843	-1.08811	0.368641	0.999997	-5.11722
Rsrc2	1.02827	19.3125	1.07752	0.368658	0.999997	-5.12916
Rnpc3	-8.18215	17.1826	-1.0878	0.368753	0.999997	-5.11749
Tfip11	-2.33902	5.52459	-1.08265	0.368921	0.999997	-5.12318
Trappc5	-7.72593	16.537	-1.08606	0.369395	0.999997	-5.11902
Aldh4a1	-2.2595	5.48137	-1.08067	0.369657	0.999997	-5.12492
Mon2	-7.70695	16.4834	-1.08451	0.369967	0.999997	-5.12038
Dnajb2	-4.51082	6.72084	-1.08451	0.369969	0.999997	-5.12038
Sap30	7.93415	16.4242	1.0844	0.370007	0.999997	-5.12047
Jak1	8.38559	17.2286	1.08424	0.37007	0.999997	-5.12062
Pgls	8.04595	16.5865	1.08416	0.370099	0.999997	-5.12069
Slc25a33;Slc25a36	-2.24774	5.47762	-1.0792	0.370207	0.999997	-5.12621
Trim56	-2.40709	5.5764	-1.078	0.370656	0.999997	-5.12727
Eef1a1	-0.736928	30.1323	-1.07221	0.370656	0.999997	-5.13383
Rptor	-4.36997	6.65186	-1.08242	0.370742	0.999997	-5.12222
Yif1b	-8.32841	17.108	-1.08183	0.37096	0.999997	-5.12273
Atxn3	-4.63525	6.81145	-1.07944	0.371849	0.999997	-5.12483
Shmt2	-1.17392	22.3754	-1.06882	0.371938	0.999997	-5.1368
Ccdc50	-2.36679	5.56243	-1.0737	0.372264	0.999997	-5.13104
Eml3	-2.35848	5.5602	-1.07253	0.372704	0.999997	-5.13206
Fdps	-5.85084	17.7377	-1.07707	0.372729	0.999997	-5.1269
Ubr2	-2.23162	5.48527	-1.07151	0.373085	0.999997	-5.13295
Cycs	-7.6541	16.2894	-1.07604	0.373113	0.999997	-5.12781
Ube2i	-8.19899	16.8993	-1.07542	0.373347	0.999997	-5.12835
Ncdn	-0.958968	20.0059	-1.06461	0.373539	0.999997	-5.1405
Mcm2	8.08428	16.8336	1.07459	0.373655	0.999997	-5.12908
Usp10	-7.58013	16.3366	-1.07448	0.373694	0.999997	-5.12917
C3	-2.39772	5.59115	-1.06954	0.373827	0.999997	-5.13468
Ptpn11	-0.732707	21.9382	-1.06361	0.37392	0.999997	-5.14138
Nosip	-7.24942	15.9191	-1.07294	0.374273	0.999997	-5.13052
Csn3	-4.47612	6.75084	-1.07292	0.37428	0.999997	-5.13054
Acad9	8.19266	16.9245	1.07175	0.374717	0.999997	-5.13156
Nr2c2	-2.39763	5.59714	-1.06705	0.374769	0.999997	-5.13686
Golt1b	-7.98156	16.6428	-1.06966	0.3755	0.999997	-5.13339
Rhbdf2	-2.35771	5.57866	-1.06459	0.375697	0.999997	-5.13901
Tmem109	-2.37483	5.59162	-1.06357	0.376086	0.999997	-5.13991
Pde6d	-2.11814	3.21954	-1.06349	0.376116	0.999997	-5.13998
Pdp1	-2.11814	3.21954	-1.06349	0.376116	0.999997	-5.13998
Cfap54	-2.11814	3.21954	-1.06349	0.376116	0.999997	-5.13998
Sf3b5	-2.11814	3.21954	-1.06349	0.376116	0.999997	-5.13998
Wars2	-2.11814	3.21954	-1.06349	0.376116	0.999997	-5.13998
Lmbr1;Lmbr1l	-2.11814	3.21954	-1.06349	0.376116	0.999997	-5.13998
Rad1	-2.11814	3.21954	-1.06349	0.376116	0.999997	-5.13998
Smarcb1	-2.11814	3.21954	-1.06349	0.376116	0.999997	-5.13998
Arfip1	-2.11814	3.21954	-1.06349	0.376116	0.999997	-5.13998
Bin1	-2.11814	3.21954	-1.06349	0.376116	0.999997	-5.13998
Clta	-2.11814	3.21954	-1.06349	0.376116	0.999997	-5.13998
Scarb2	-2.11814	3.21954	-1.06349	0.376116	0.999997	-5.13998
Kpna3	-2.11814	3.21954	-1.06349	0.376116	0.999997	-5.13998
Anp32a	-2.11814	3.21954	-1.06349	0.376116	0.999997	-5.13998
Hmgb3	-2.11814	3.21954	-1.06349	0.376116	0.999997	-5.13998
Slk	-2.11814	3.21954	-1.06349	0.376116	0.999997	-5.13998
Supt5h	-2.11814	3.21954	-1.06349	0.376116	0.999997	-5.13998
Psmb5	-2.11814	3.21954	-1.06349	0.376116	0.999997	-5.13998
Cfdp1	-2.11814	3.21954	-1.06349	0.376116	0.999997	-5.13998
Tom1	-2.11814	3.21954	-1.06349	0.376116	0.999997	-5.13998
B2m	-2.11814	3.21954	-1.06349	0.376116	0.999997	-5.13998
Ctsl	-2.11814	3.21954	-1.06349	0.376116	0.999997	-5.13998
Alad	-2.11814	3.21954	-1.06349	0.376116	0.999997	-5.13998
Serpinb2	-2.11814	3.21954	-1.06349	0.376116	0.999997	-5.13998
Crisp2	-2.11814	3.21954	-1.06349	0.376116	0.999997	-5.13998
Tap1	-2.11814	3.21954	-1.06349	0.376116	0.999997	-5.13998
Ptgs1	-2.11814	3.21954	-1.06349	0.376116	0.999997	-5.13998
Gfus	-2.11814	3.21954	-1.06349	0.376116	0.999997	-5.13998
Gsta4	-2.11814	3.21954	-1.06349	0.376116	0.999997	-5.13998
Nfkb1	-2.11814	3.21954	-1.06349	0.376116	0.999997	-5.13998
Ubtf	-2.11814	3.21954	-1.06349	0.376116	0.999997	-5.13998
Man2a1	-2.11814	3.21954	-1.06349	0.376116	0.999997	-5.13998
Scp2	-2.11814	3.21954	-1.06349	0.376116	0.999997	-5.13998
Tap2	-2.11814	3.21954	-1.06349	0.376116	0.999997	-5.13998
Cd9	-2.11814	3.21954	-1.06349	0.376116	0.999997	-5.13998
Inpp1	-2.11814	3.21954	-1.06349	0.376116	0.999997	-5.13998
Cav1	-2.11814	3.21954	-1.06349	0.376116	0.999997	-5.13998
Fmod	-2.11814	3.21954	-1.06349	0.376116	0.999997	-5.13998
Anapc1	-2.11814	3.21954	-1.06349	0.376116	0.999997	-5.13998
Adk	-2.11814	3.21954	-1.06349	0.376116	0.999997	-5.13998
Actn4	-2.11814	3.21954	-1.06349	0.376116	0.999997	-5.13998
Mrps6	-2.11814	3.21954	-1.06349	0.376116	0.999997	-5.13998
Strn4	-2.11814	3.21954	-1.06349	0.376116	0.999997	-5.13998
Tnks1bp1	-2.11814	3.21954	-1.06349	0.376116	0.999997	-5.13998
Gabarap;Gabarapl1;Gabarapl2	-2.11814	3.21954	-1.06349	0.376116	0.999997	-5.13998
Vsnl1	-2.11814	3.21954	-1.06349	0.376116	0.999997	-5.13998
Mcl1	-2.11814	3.21954	-1.06349	0.376116	0.999997	-5.13998
Atp1b3	-2.11814	3.21954	-1.06349	0.376116	0.999997	-5.13998
Xdh	-2.11814	3.21954	-1.06349	0.376116	0.999997	-5.13998
Col17a1	-2.11814	3.21954	-1.06349	0.376116	0.999997	-5.13998
Eps8	-2.11814	3.21954	-1.06349	0.376116	0.999997	-5.13998
Fam83b	-2.11814	3.21954	-1.06349	0.376116	0.999997	-5.13998
Foxred1	-2.11814	3.21954	-1.06349	0.376116	0.999997	-5.13998
Dhps	-2.11814	3.21954	-1.06349	0.376116	0.999997	-5.13998
Niban1	-2.11814	3.21954	-1.06349	0.376116	0.999997	-5.13998
Amz2	-2.11814	3.21954	-1.06349	0.376116	0.999997	-5.13998
Dync2h1	-2.11814	3.21954	-1.06349	0.376116	0.999997	-5.13998
Ndufa4l2	-2.11814	3.21954	-1.06349	0.376116	0.999997	-5.13998
Herc2	-2.11814	3.21954	-1.06349	0.376116	0.999997	-5.13998
Clpb	-2.11814	3.21954	-1.06349	0.376116	0.999997	-5.13998
Lama5	-2.11814	3.21954	-1.06349	0.376116	0.999997	-5.13998
Bcap31	-2.11814	3.21954	-1.06349	0.376116	0.999997	-5.13998
Lama3	-2.11814	3.21954	-1.06349	0.376116	0.999997	-5.13998
A2m;Pzp	-2.11814	3.21954	-1.06349	0.376116	0.999997	-5.13998
Nqo1	-2.11814	3.21954	-1.06349	0.376116	0.999997	-5.13998
Pcnp	-2.11814	3.21954	-1.06349	0.376116	0.999997	-5.13998
Ppp2r5b;Ppp2r5e	-2.11814	3.21954	-1.06349	0.376116	0.999997	-5.13998
Nap1l4	-2.11814	3.21954	-1.06349	0.376116	0.999997	-5.13998
Mogs	-2.11814	3.21954	-1.06349	0.376116	0.999997	-5.13998
Gatd1	-2.11814	3.21954	-1.06349	0.376116	0.999997	-5.13998
Gns	-2.11814	3.21954	-1.06349	0.376116	0.999997	-5.13998
Arl15	-2.11814	3.21954	-1.06349	0.376116	0.999997	-5.13998
Tor4a	-2.11814	3.21954	-1.06349	0.376116	0.999997	-5.13998
Cstf2	-2.11814	3.21954	-1.06349	0.376116	0.999997	-5.13998
Zc3h14	-2.11814	3.21954	-1.06349	0.376116	0.999997	-5.13998
Tmem214	-2.11814	3.21954	-1.06349	0.376116	0.999997	-5.13998
Usp47	-2.11814	3.21954	-1.06349	0.376116	0.999997	-5.13998
Mbnl2	-2.11814	3.21954	-1.06349	0.376116	0.999997	-5.13998
Casp9	-2.11814	3.21954	-1.06349	0.376116	0.999997	-5.13998
Ank2	-2.11814	3.21954	-1.06349	0.376116	0.999997	-5.13998
Acat2	-2.11814	3.21954	-1.06349	0.376116	0.999997	-5.13998
Mrpl38	-2.11814	3.21954	-1.06349	0.376116	0.999997	-5.13998
Gpt	-2.11814	3.21954	-1.06349	0.376116	0.999997	-5.13998
Aldh1l1	-2.11814	3.21954	-1.06349	0.376116	0.999997	-5.13998
Kdelr3	-2.11814	3.21954	-1.06349	0.376116	0.999997	-5.13998
Spart	-2.11814	3.21954	-1.06349	0.376116	0.999997	-5.13998
Taf6l	-2.11814	3.21954	-1.06349	0.376116	0.999997	-5.13998
Ifih1	-2.11814	3.21954	-1.06349	0.376116	0.999997	-5.13998
Rbpms2	-2.11814	3.21954	-1.06349	0.376116	0.999997	-5.13998
Pdcd10	-2.11814	3.21954	-1.06349	0.376116	0.999997	-5.13998
Fam110c	-2.11814	3.21954	-1.06349	0.376116	0.999997	-5.13998
Pla2g15	-2.11814	3.21954	-1.06349	0.376116	0.999997	-5.13998
Pxn	-2.11814	3.21954	-1.06349	0.376116	0.999997	-5.13998
Rabep2	-2.11814	3.21954	-1.06349	0.376116	0.999997	-5.13998
Spryd4	-2.11814	3.21954	-1.06349	0.376116	0.999997	-5.13998
Dcxr	-2.11814	3.21954	-1.06349	0.376116	0.999997	-5.13998
Cwh43	-2.11814	3.21954	-1.06349	0.376116	0.999997	-5.13998
Camk1	-2.11814	3.21954	-1.06349	0.376116	0.999997	-5.13998
Lrp1	-2.11814	3.21954	-1.06349	0.376116	0.999997	-5.13998
Etfdh	-2.11814	3.21954	-1.06349	0.376116	0.999997	-5.13998
Clip1	-2.11814	3.21954	-1.06349	0.376116	0.999997	-5.13998
Frk	-2.11814	3.21954	-1.06349	0.376116	0.999997	-5.13998
Lactb2	-2.11814	3.21954	-1.06349	0.376116	0.999997	-5.13998
Rassf1	-2.11814	3.21954	-1.06349	0.376116	0.999997	-5.13998
Pecr	-2.11814	3.21954	-1.06349	0.376116	0.999997	-5.13998
Tp53rkb	-2.11814	3.21954	-1.06349	0.376116	0.999997	-5.13998
Mrpl49	-2.11814	3.21954	-1.06349	0.376116	0.999997	-5.13998
Nudt21	-2.11814	3.21954	-1.06349	0.376116	0.999997	-5.13998
Pcyox1	-2.11814	3.21954	-1.06349	0.376116	0.999997	-5.13998
Mrpl19	-2.11814	3.21954	-1.06349	0.376116	0.999997	-5.13998
Ndufb8	-2.11814	3.21954	-1.06349	0.376116	0.999997	-5.13998
Drap1	-2.11814	3.21954	-1.06349	0.376116	0.999997	-5.13998
Fam162a	-2.11814	3.21954	-1.06349	0.376116	0.999997	-5.13998
Iscu	-2.11814	3.21954	-1.06349	0.376116	0.999997	-5.13998
Dda1	-2.11814	3.21954	-1.06349	0.376116	0.999997	-5.13998
Mlst8	-2.11814	3.21954	-1.06349	0.376116	0.999997	-5.13998
Serpina1f	-2.11814	3.21954	-1.06349	0.376116	0.999997	-5.13998
Dap3	-2.11814	3.21954	-1.06349	0.376116	0.999997	-5.13998
Erg28	-2.11814	3.21954	-1.06349	0.376116	0.999997	-5.13998
Gsdma	-2.11814	3.21954	-1.06349	0.376116	0.999997	-5.13998
Ccdc22	-2.11814	3.21954	-1.06349	0.376116	0.999997	-5.13998
Cd2ap	-2.11814	3.21954	-1.06349	0.376116	0.999997	-5.13998
Qtrt1	-2.11814	3.21954	-1.06349	0.376116	0.999997	-5.13998
Cnpy2	-2.11814	3.21954	-1.06349	0.376116	0.999997	-5.13998
Actr10	-2.11814	3.21954	-1.06349	0.376116	0.999997	-5.13998
Bcam	-2.11814	3.21954	-1.06349	0.376116	0.999997	-5.13998
Aqp5	-2.11814	3.21954	-1.06349	0.376116	0.999997	-5.13998
Mtm1	-2.11814	3.21954	-1.06349	0.376116	0.999997	-5.13998
Nudcd1	-2.28929	5.53944	-1.0634	0.376151	0.999997	-5.14006
Amot	8.63248	17.6979	1.06716	0.376439	0.999997	-5.13557
Tfrc	7.94365	16.5569	1.06634	0.376751	0.999997	-5.13629
Anapc7	-7.63215	16.3551	-1.06621	0.3768	0.999997	-5.13641
Pdcd4	-0.757621	20.6333	-1.05474	0.377314	0.999997	-5.14914
Mettl13	8.91074	18.1046	1.06457	0.377418	0.999997	-5.13784
Rpl18a	1.22103	26.2873	1.05387	0.377647	0.999997	-5.14989
Dok1	-2.39308	5.61374	-1.05907	0.377794	0.999997	-5.14383
Ufd1	-2.33386	5.57793	-1.05876	0.377914	0.999997	-5.14411
Nfu1	-2.34658	5.58645	-1.05848	0.378019	0.999997	-5.14435
Lima1	8.0948	16.9453	1.0626	0.378161	0.999997	-5.13956
Nup160	-7.77215	16.7655	-1.06161	0.378534	0.999997	-5.14042
Tcerg1	7.82841	16.4236	1.06141	0.37861	0.999997	-5.14059
Ubac2	-7.43643	16.1893	-1.06068	0.378888	0.999997	-5.14123
Psmd14	9.18489	18.5737	1.06015	0.379089	0.999997	-5.14169
Arhgap1	7.53628	16.0948	1.05971	0.379256	0.999997	-5.14208
Adprs	-2.20103	5.50623	-1.05398	0.37974	0.999997	-5.14828
Eftud2	-0.841582	21.7576	-1.04665	0.380434	0.999997	-5.15619
Txnrd1	-2.29953	5.57232	-1.05214	0.380446	0.999997	-5.14988
Far1	8.33667	17.1694	1.0564	0.380513	0.999997	-5.14496
Rprd1a	7.73906	16.3411	1.05578	0.380748	0.999997	-5.1455
Tmem167a	-2.36631	5.61604	-1.05131	0.380763	0.999997	-5.1506
Kpnb1	-1.04096	23.6488	-1.04456	0.381244	0.999997	-5.15801
Paf1	-2.22288	5.52931	-1.04992	0.381296	0.999997	-5.15181
Map4	-7.83153	16.9978	-1.05263	0.381951	0.999997	-5.14825
Eif3e	-0.867267	23.167	-1.04151	0.38243	0.999997	-5.16066
Ppp6c	8.26967	17.2144	1.05039	0.382808	0.999997	-5.15019
Mettl16	-2.28472	5.57813	-1.04576	0.3829	0.999997	-5.15543
Tkfc	-2.32641	5.60616	-1.04505	0.383175	0.999997	-5.15605
Nup210	-2.37911	5.64038	-1.04463	0.383335	0.999997	-5.15641
Timm17b	-2.2246	5.54473	-1.04374	0.383681	0.999997	-5.15719
Ddx49	8.16905	17.0723	1.04797	0.383733	0.999997	-5.15229
Tbcb	-2.35977	5.63233	-1.04295	0.383987	0.999997	-5.15788
G3bp2	-2.35517	5.62986	-1.04277	0.384057	0.999997	-5.15803
Bud23	-2.32956	5.62019	-1.04008	0.3851	0.999997	-5.16037
Pfdn1	-2.28224	5.59707	-1.03715	0.386241	0.999997	-5.16291
Clp1	-7.63731	16.5519	-1.04139	0.386269	0.999997	-5.15801
Neu1	7.94314	16.7836	1.04105	0.386399	0.999997	-5.1583
Spindoc	-2.35138	5.6442	-1.03593	0.386714	0.999997	-5.16397
Trmt1l	-8.24133	17.3387	-1.04024	0.386715	0.999997	-5.15901
Fdxr	7.54078	16.1354	1.04022	0.386723	0.999997	-5.15903
Prpf4b	-1.00772	21.592	-1.03027	0.386837	0.999997	-5.17043
Eral1	8.00525	16.896	1.03918	0.387123	0.999997	-5.15992
Pdcl	-2.29005	5.60838	-1.03452	0.387265	0.999997	-5.16519
Macf1	-7.74071	16.9551	-1.0387	0.38731	0.999997	-5.16034
Erlin2	-0.708229	22.0721	-1.02819	0.387657	0.999997	-5.17223
Nudt7	-2.27307	5.60031	-1.03333	0.387728	0.999997	-5.16622
Brd2	8.37013	17.4752	1.03736	0.387832	0.999997	-5.1615
Tbk1	7.39272	16.0031	1.03728	0.387859	0.999997	-5.16157
Msrb2	-2.32015	5.63222	-1.03266	0.387993	0.999997	-5.1668
Clk4	-0.927472	22.6826	-1.02723	0.388034	0.999997	-5.17305
Mcmbp	-7.86473	16.8514	-1.0367	0.388086	0.999997	-5.16207
Sntb1	-2.29839	5.61885	-1.0324	0.388094	0.999997	-5.16703
Txndc12	8.03218	16.9548	1.03613	0.388306	0.999997	-5.16256
Vps52	-7.17426	16.0381	-1.03605	0.388338	0.999997	-5.16263
Nampt	7.71401	16.5326	1.03537	0.388603	0.999997	-5.16322
Kdm5a	8.09814	17.0172	1.03396	0.389151	0.999997	-5.16444
Vps51	-3.27541	18.6143	-1.03374	0.389237	0.999997	-5.16463
Rpl39	-12.5123	19.9076	-1.03294	0.389548	0.999997	-5.16532
Pycr1;Pycr2	-2.20935	5.57333	-1.0273	0.390094	0.999997	-5.17144
Lig1	-2.34032	5.65889	-1.02708	0.390181	0.999997	-5.17163
Nisch	-2.29708	5.63382	-1.02588	0.390654	0.999997	-5.17267
Thumpd3	7.46533	16.0586	1.0298	0.390775	0.999997	-5.16804
Hnrnpa1	-1.18534	21.7375	-1.01978	0.390991	0.999997	-5.1795
Psmd2	-0.659085	22.8715	-1.01902	0.391295	0.999997	-5.18016
Hspbp1	-2.26244	5.6154	-1.02417	0.391329	0.999997	-5.17414
Nckap1	-0.712888	20.8037	-1.0172	0.392019	0.999997	-5.18172
Arl6	-5.51787	17.8826	-1.02434	0.392917	0.999997	-5.17276
Rtn3	8.54328	17.8679	1.0239	0.393087	0.999997	-5.17313
Epb41l2	-8.30769	17.9202	-1.02364	0.39319	0.999997	-5.17336
Lgals3	-5.81342	18.1356	-1.02327	0.393336	0.999997	-5.17368
Sec63	8.39443	17.5966	1.02321	0.39336	0.999997	-5.17373
Smarca1	8.2717	17.3957	1.0231	0.393404	0.999997	-5.17383
Padi4	-7.39077	16.4922	-1.02238	0.393688	0.999997	-5.17445
Fkbp11	7.88185	16.7868	1.02224	0.393743	0.999997	-5.17457
Mrpl14	-2.32136	5.67051	-1.01738	0.394022	0.999997	-5.18
Msto1	-0.952304	19.6724	-1.01176	0.394197	0.999997	-5.18641
Lamc1	8.82614	18.4083	1.02068	0.394356	0.999997	-5.17591
Senp1	7.57255	16.3373	1.02016	0.394562	0.999997	-5.17636
U2af1	0.719062	26.5065	1.01077	0.394595	0.999997	-5.18726
Capn1	8.55861	18.0266	1.01907	0.394993	0.999997	-5.1773
Pds5b	7.98398	16.9686	1.01762	0.395567	0.999997	-5.17855
Slc27a4	-5.60032	18.1849	-1.01643	0.396038	0.999997	-5.17957
Fh	8.34828	17.72	1.01483	0.396671	0.999997	-5.18094
Dctn1	-5.89922	18.6839	-1.01381	0.397078	0.999997	-5.18182
Acat1	-2.23512	5.63407	-1.00896	0.397376	0.999997	-5.18724
Camk2d	-7.70607	17.0935	-1.01234	0.397664	0.999997	-5.18309
Casp6	0.715346	20.7574	1.00125	0.398441	0.999997	-5.19545
Hnrnph2	-10.1832	16.4164	-1.00864	0.399138	0.999997	-5.18627
Elob	7.73356	16.7173	1.00829	0.399276	0.999997	-5.18656
Rpf1	7.90554	16.9464	1.00802	0.399384	0.999997	-5.18679
Dnm3	8.43068	17.8591	1.00786	0.39945	0.999997	-5.18694
Srsf5	8.65036	18.2033	1.00637	0.400047	0.999997	-5.18821
Cad	-0.919941	23.326	-0.996577	0.40034	0.999997	-5.19945
Maz	8.87013	18.4425	1.00547	0.400406	0.999997	-5.18898
Polr1c	8.3235	17.6993	1.00519	0.400518	0.999997	-5.18922
Eif2a	-7.63418	16.7291	-1.00469	0.400719	0.999997	-5.18965
Mrpl28	-5.81433	18.3621	-1.00405	0.400974	0.999997	-5.1902
Eif3g	-7.3882	16.6855	-1.0035	0.401195	0.999997	-5.19067
Daxx	7.59316	16.5857	1.00286	0.401451	0.999997	-5.19121
Atp2a1	-0.695915	21.9859	-0.993262	0.401694	0.999997	-5.20228
Prpf40a	-7.8963	16.9691	-1.00201	0.401795	0.999997	-5.19195
Ndufv1	8.19496	17.4854	1.00187	0.401853	0.999997	-5.19207
Ube2d2;Ube2d2b;Ube2d3	-11.2572	18.2588	-1.00056	0.40238	0.999997	-5.19319
Tbc1d9b	-0.673754	20.5569	-0.98986	0.403088	0.999997	-5.20519
Srp14	-7.19687	16.361	-0.997903	0.403449	0.999997	-5.19546
Tab2	-9.64109	15.7037	-0.997714	0.403526	0.999997	-5.19562
Slc32a1	7.372	16.2338	0.996346	0.404079	0.999997	-5.19679
Ltf	8.47306	18.1453	0.994906	0.404661	0.999997	-5.19802
Msh3	7.67657	16.7266	0.993905	0.405067	0.999997	-5.19888
Cul4b	2.33305	17.5708	0.990411	0.40509	0.999997	-5.20296
Csde1	-0.925651	20.0958	-0.984935	0.405113	0.999997	-5.20939
Prmt1	7.89043	17.1221	0.989612	0.406811	0.999997	-5.20254
Smpd4	8.15988	17.5804	0.989368	0.40691	0.999997	-5.20275
Scrib	-6.99902	16.0932	-0.989258	0.406955	0.999997	-5.20284
Slc35b2	-7.12734	16.2802	-0.988256	0.407363	0.999997	-5.20369
Serpinc1	-10.3466	16.9163	-0.985936	0.40831	0.999997	-5.20567
Ccn1	-9.93115	16.269	-0.98566	0.408423	0.999997	-5.2059
Dhrs7b	7.55045	16.5816	0.984914	0.408728	0.999997	-5.20654
Nkrf	8.08854	17.4934	0.983236	0.409415	0.999997	-5.20797
Psmb7	-0.990362	20.3746	-0.971838	0.410549	0.999997	-5.22052
Luc7l2	1.13043	27.1337	0.97021	0.41123	0.999997	-5.2219
Cpne3	-7.67399	16.9152	-0.978385	0.411407	0.999997	-5.21209
Pard6a;Pard6b;Pard6g	-5.11401	17.406	-0.977582	0.411738	0.999997	-5.21277
Huwe1	-1.17169	20.9226	-0.968965	0.41182	0.999997	-5.2229
Hcfc1	-7.71912	17.2221	-0.977374	0.411824	0.999997	-5.21294
Cxxc1	9.03395	19.0407	0.977356	0.411831	0.999997	-5.21296
Snrpa1	-7.93304	17.437	-0.975629	0.412543	0.999997	-5.21442
Emd	0.991156	21.9952	0.965972	0.413007	0.999997	-5.22549
Nup214	-9.52192	15.7896	-0.972769	0.413726	0.999997	-5.21685
Eif3k	-5.56974	18.3443	-0.970605	0.414622	0.999997	-5.21868
Umps	7.59916	16.8285	0.970509	0.414662	0.999997	-5.21876
Capzb	8.32546	18.0026	0.969095	0.415249	0.999997	-5.21996
Prep	7.51635	16.6207	0.966896	0.416164	0.999997	-5.22182
Eefsec	-1.29028	21.7651	-0.958736	0.416698	0.999997	-5.23107
Mynn	8.31814	18.1432	0.965358	0.416804	0.999997	-5.22311
Mri1	-0.785358	19.9738	-0.956843	0.41686	0.999997	-5.2332
Cdsn	-5.6134	18.2467	-0.964103	0.417328	0.999997	-5.22417
Znf326	-7.49948	17.008	-0.962518	0.417991	0.999997	-5.22551
Pgd	-0.648794	22.2728	-0.953275	0.418376	0.999997	-5.2362
Naa10;Naa11	6.83197	15.4981	0.961024	0.418616	0.999997	-5.22677
Dek	8.59014	18.4231	0.960915	0.418661	0.999997	-5.22686
Map3k7	-7.11668	16.4892	-0.959905	0.419085	0.999997	-5.22771
Septin7	-6.8839	15.927	-0.957524	0.420084	0.999997	-5.22972
Tpr	9.54048	19.3515	0.957013	0.420299	0.999997	-5.23015
Mpc2	7.44717	16.7064	0.950559	0.423021	0.999997	-5.23557
Psmd12	7.48478	16.8284	0.950092	0.423218	0.999997	-5.23597
Polr2b	-7.6152	17.4464	-0.949986	0.423264	0.999997	-5.23605
Znf24	-7.0956	16.6315	-0.949935	0.423285	0.999997	-5.2361
Hexim1	-7.13339	16.5867	-0.947693	0.424235	0.999997	-5.23798
Rab32	7.82249	17.4078	0.946997	0.424531	0.999997	-5.23856
Ipo11	-4.91066	17.4519	-0.946957	0.424548	0.999997	-5.23859
Traf4	-5.64435	18.4299	-0.946189	0.424874	0.999997	-5.23924
Acsl3	-4.90341	17.3075	-0.94508	0.425345	0.999997	-5.24017
Rpl37a	9.45399	20.226	0.94459	0.425554	0.999997	-5.24058
Cdk5	7.81659	17.4257	0.943887	0.425853	0.999997	-5.24116
Hba	-9.8517	16.7098	-0.942162	0.426588	0.999997	-5.24261
Rbm28	-0.661659	20.6058	-0.931449	0.427761	0.999997	-5.25446
Rpl15	0.782235	29.9489	0.93099	0.427961	0.999997	-5.25484
Col11a1	-9.99835	11.1915	-0.938578	0.42812	0.999997	-5.2456
Psma4	8.01308	17.803	0.937647	0.428519	0.999997	-5.24638
Abr	6.9627	15.889	0.937589	0.428543	0.999997	-5.24643
Cdc23	7.12549	16.2788	0.936398	0.429054	0.999997	-5.24742
Arid1a	-7.36298	16.714	-0.936237	0.429123	0.999997	-5.24756
Nom1	-7.324	17.0414	-0.935888	0.429273	0.999997	-5.24785
Commd2	-7.46797	16.9974	-0.933185	0.430435	0.999997	-5.2501
Aimp2	-7.47857	17.271	-0.932521	0.43072	0.999997	-5.25065
Pmpcb	-0.770362	22.535	-0.922705	0.431577	0.999997	-5.26173
Dennd10	7.68427	17.2875	0.93014	0.431747	0.999997	-5.25264
Lrba	-1.10863	21.1562	-0.921733	0.432034	0.999997	-5.26251
Cct8	-0.665941	23.7292	-0.920816	0.432406	0.999997	-5.26329
Nup88	-7.05348	16.7108	-0.927297	0.432975	0.999997	-5.255
Polr2h	-5.53525	18.1887	-0.926729	0.433221	0.999997	-5.25547
Gkap1	7.77274	17.4337	0.925507	0.433751	0.999997	-5.25648
Camsap3	-7.018	16.7589	-0.924611	0.434139	0.999997	-5.25723
Adar	7.77057	17.5233	0.924357	0.43425	0.999997	-5.25744
Slc25a3	0.825165	24.6672	0.916598	0.434261	0.999997	-5.26678
Igf2bp1	-0.731427	23.2253	-0.915837	0.434597	0.999997	-5.26741
Abcf2	0.592198	23.5351	0.915453	0.434766	0.999997	-5.26773
Serbp1	7.81284	17.6627	0.921436	0.435519	0.999997	-5.25986
Acsl4	1.0906	21.9787	0.913425	0.435663	0.999997	-5.2694
Mrgbp	-6.76315	10.2675	-0.918836	0.436652	0.999997	-5.26201
Aars1	7.47622	17.2467	0.915453	0.43813	0.999997	-5.26481
Baz2a	-5.64772	19.0191	-0.913083	0.439169	0.999997	-5.26677
Pdia5	8.30777	18.5	0.911366	0.439923	0.999997	-5.26818
Znf316	1.37985	24.2194	0.904822	0.440758	0.999997	-5.27537
Pgk1	-0.878334	24.0018	-0.901608	0.440916	0.999997	-5.27913
Prpsap2	-0.780923	22.4737	-0.900765	0.441294	0.999997	-5.27982
Rpl24	-1.18927	29.8859	-0.899923	0.442165	0.999997	-5.28007
Idh3a	-0.841139	22.4853	-0.897824	0.442612	0.999997	-5.28223
Lrrc47	7.86931	17.7817	0.905164	0.442657	0.999997	-5.27329
Edc4	-6.95377	16.3515	-0.903075	0.443581	0.999997	-5.27501
Wbp11	0.605609	20.7797	0.89538	0.44371	0.999997	-5.28423
Afdn	-7.41944	17.3057	-0.90242	0.443871	0.999997	-5.27554
Pdlim7	-2.81006	18.6778	-0.90216	0.443986	0.999997	-5.27576
Eif2s2	1.09604	22.356	0.88882	0.446814	0.999997	-5.28945
Scaf1	-5.48435	18.8435	-0.894867	0.447231	0.999997	-5.28173
Dync1li1	-0.598339	22.1296	-0.884526	0.448617	0.999997	-5.29307
Prdm15	0.676977	22.2207	0.884433	0.44866	0.999997	-5.29315
Sun1	-6.81419	16.6244	-0.888843	0.449928	0.999997	-5.28665
Rdh10	5.78957	11.8472	0.887539	0.450513	0.999997	-5.28771
Maip1	-6.38977	16.0023	-0.887078	0.450721	0.999997	-5.28809
Syncrip	-0.592637	22.971	-0.879615	0.450854	0.999997	-5.29706
Itgb4	7.55215	17.6006	0.886474	0.450992	0.999997	-5.28858
Nup155	-0.572053	21.2863	-0.878243	0.451481	0.999997	-5.29817
Ptbp3	-7.08315	16.8692	-0.885259	0.451539	0.999997	-5.28957
Rps16	-0.933973	26.6928	-0.877217	0.45195	0.999997	-5.299
Ddx6	-3.43364	19.5989	-0.882913	0.452597	0.999997	-5.29148
Lgals1	0.81538	25.1305	0.875794	0.452602	0.999997	-5.30015
Ubap2l	-6.57656	16.2284	-0.882581	0.452747	0.999997	-5.29175
Tma16	2.25865	24.084	0.880747	0.452812	0.999997	-5.29392
Acadm	-0.880172	20.5092	-0.874966	0.452982	0.999997	-5.30082
Znf22	-8.1115	18.6802	-0.878702	0.454502	0.999997	-5.29489
Nop53	-5.21317	18.341	-0.878316	0.454677	0.999997	-5.29521
Ppia	-0.594308	23.5634	-0.86973	0.455388	0.999997	-5.30505
H2bc21;H2bc26;H2bu2	8.65885	19.4113	0.875917	0.455766	0.999997	-5.29715
Carhsp1	-6.12575	15.648	-0.874383	0.456464	0.999997	-5.29839
Pspc1	7.14133	16.9236	0.874181	0.456556	0.999997	-5.29856
Krt16	0.861183	24.446	0.866781	0.456749	0.999997	-5.30743
Stoml2	6.58629	16.0979	0.873549	0.456844	0.999997	-5.29907
Ergic2	2.90963	18.8526	0.871149	0.457938	0.999997	-5.30101
Rras	-7.62883	17.8239	-0.869518	0.458683	0.999997	-5.30232
Igf2bp3	-7.1052	17.2825	-0.869218	0.45882	0.999997	-5.30257
Mapre2	7.66344	17.8	0.868266	0.459256	0.999997	-5.30333
Patz1	1.4401	20.6104	0.864166	0.459625	0.999997	-5.30801
U2af2	0.561359	25.1809	0.859773	0.459998	0.999997	-5.31305
Ganab	-1.05418	22.8735	-0.857284	0.461282	0.999997	-5.31493
Dock4	-9.4032	16.974	-0.863557	0.461416	0.999997	-5.30713
Tubgcp2	-4.89502	17.7289	-0.860284	0.462923	0.999997	-5.30975
Aldh1b1	7.35215	17.4349	0.859912	0.463095	0.999997	-5.31005
Larp7	-6.67641	16.5817	-0.855768	0.46501	0.999997	-5.31337
Vps35	-0.575294	22.581	-0.845826	0.466526	0.999997	-5.32418
H4c1	1.42932	26.0686	0.847831	0.467257	0.999997	-5.32105
Taldo1	6.96216	16.9297	0.848638	0.468322	0.999997	-5.31907
Pdia3	-0.681593	23.3431	-0.837216	0.470598	0.999997	-5.33101
Zfp62	0.883352	26.2789	0.836854	0.47077	0.999997	-5.33129
Arglu1	0.576435	28.748	0.835593	0.471369	0.999997	-5.33229
Prdx2	-8.78667	20.1693	-0.841901	0.471472	0.999997	-5.32443
Eif2b1	7.31502	17.5625	0.841437	0.47169	0.999997	-5.3248
Sh3glb1	6.89426	16.7867	0.841031	0.471881	0.999997	-5.32512
Myef2	0.781814	20.1401	0.83361	0.472313	0.999997	-5.33385
Rpsa	-0.690492	24.1222	-0.830936	0.473588	0.999997	-5.33596
Gart	-0.549997	22.3973	-0.830577	0.47376	0.999997	-5.33624
Cdk2	-3.35557	19.6662	-0.831655	0.476301	0.999997	-5.33254
Cpsf2	-6.78922	17.0757	-0.831172	0.476529	0.999997	-5.33292
Pum3	0.670125	23.2559	0.824462	0.476689	0.999997	-5.34105
Mtap	-7.68784	18.3885	-0.827476	0.478283	0.999997	-5.33584
Rab35	-9.89946	17.9188	-0.825852	0.479055	0.999997	-5.33711
Rbpms	3.14623	18.5801	0.823868	0.48	0.999997	-5.33867
Psma1	-0.684417	21.3077	-0.817167	0.480204	0.999997	-5.34675
Glud1	-0.537007	21.9722	-0.812403	0.482513	0.999997	-5.35046
Ola1	-0.765221	22.7898	-0.811829	0.482791	0.999997	-5.35091
Rbm39	0.877738	26.0566	0.810406	0.483483	0.999997	-5.35202
Clcn3	6.10133	14.7363	0.813531	0.484952	0.999997	-5.34676
Nop58	1.07976	21.8305	0.806813	0.485747	0.999997	-5.35432
Pdgfa	0.668094	21.5786	0.805041	0.486099	0.999997	-5.35617
Arf5	-0.716423	22.9884	-0.804954	0.486141	0.999997	-5.35624
Psmd13	-0.563445	22.3064	-0.803974	0.486621	0.999997	-5.357
Las1l	-5.43102	18.9722	-0.809607	0.486844	0.999997	-5.34982
Hnrnpa3	1.05131	23.5372	0.803403	0.487318	0.999997	-5.35704
H1-2	0.513132	30.149	0.795221	0.49092	0.999997	-5.36375
Hnrnpa2b1	-0.579235	22.9274	-0.795087	0.490986	0.999997	-5.36385
Pabpn1	-6.02781	9.50806	-0.800455	0.491282	0.999997	-5.35692
Ngly1	0.568297	21.4076	0.793534	0.491752	0.999997	-5.36504
Rps3	-0.898618	27.0768	-0.791805	0.492606	0.999997	-5.36637
Asns	-0.688297	22.9485	-0.790663	0.493172	0.999997	-5.36724
Cdk13	-4.68099	17.7191	-0.796398	0.493261	0.999997	-5.36005
Ercc2	-4.5194	17.0297	-0.791464	0.495678	0.999997	-5.36385
Atp1a1	-0.559204	23.7657	-0.784676	0.496143	0.999997	-5.37182
Tex30	2.66306	18.8918	0.788279	0.497243	0.999997	-5.3663
Znf689	9.90714	9.23218	0.787443	0.497655	0.999997	-5.36694
Men1	-4.5711	11.2906	-0.786803	0.49797	0.999997	-5.36743
Picalm	-5.89798	9.51655	-0.786469	0.498135	0.999997	-5.36768
Hk1	-0.698043	22.4325	-0.779426	0.498762	0.999997	-5.37581
Elovl1	-5.68036	9.39212	-0.778426	0.502114	0.999997	-5.37382
Pgam1	-1.0959	21.0033	-0.773765	0.502352	0.999997	-5.37938
Rpl22	-0.769999	28.7813	-0.771883	0.502545	0.999997	-5.38153
Hip1r	-5.8402	9.54942	-0.77689	0.502877	0.999997	-5.37499
Psma2	-6.20359	9.88384	-0.776146	0.503247	0.999997	-5.37556
Nudt5	0.642892	22.4595	0.770453	0.503265	0.999997	-5.38261
Snrnp27	0.948017	22.6062	0.770642	0.503282	0.999997	-5.38235
Pnpla8	-6.01926	9.72481	-0.775357	0.50364	0.999997	-5.37616
Dock7	-5.90527	9.62673	-0.774814	0.50391	0.999997	-5.37657
Nhlrc2	-5.28998	9.08088	-0.773481	0.504574	0.999997	-5.37758
Rps27a	-0.9146	30.3245	-0.766731	0.505143	0.999997	-5.38541
Rcl1	-5.96979	9.72444	-0.770511	0.506057	0.999997	-5.37983
Aldh16a1	-5.61701	9.41989	-0.768573	0.507027	0.999997	-5.3813
Slc7a5	1.04396	20.0189	0.763522	0.507354	0.999997	-5.38725
Ints4	0.704663	22.6683	0.762137	0.50747	0.999997	-5.38886
Cltc	-0.755897	23.6126	-0.762081	0.507499	0.999997	-5.3889
Arf1;Arf3	-6.95191	17.9028	-0.767583	0.507523	0.999997	-5.38205
Dhx57	-5.87628	9.67592	-0.76648	0.508076	0.999997	-5.38288
Smarcc2	-4.71338	18.3813	-0.764468	0.509086	0.999997	-5.3844
Cdh1	-5.39142	9.24866	-0.764395	0.509123	0.999997	-5.38445
Csk	-0.60077	20.7676	-0.758517	0.50931	0.999997	-5.39157
Acsl5	-5.61539	9.46308	-0.763461	0.509592	0.999997	-5.38516
Cwc25	0.569659	21.1988	0.757757	0.509697	0.999997	-5.39214
Aldh9a1	-0.600159	21.4293	-0.7567	0.510236	0.999997	-5.39293
Mrpl21	-4.1483	16.9907	-0.761955	0.510351	0.999997	-5.38629
Plp2	-5.89158	9.73408	-0.761686	0.510486	0.999997	-5.38649
Poldip2	0.563047	23.175	0.754261	0.511481	0.999997	-5.39474
Acot13	-5.2874	9.19258	-0.759612	0.511532	0.999997	-5.38805
Crispld2	0.783638	23.1922	0.754121	0.511552	0.999997	-5.39485
Shmt1	-5.74448	9.62444	-0.758774	0.511955	0.999997	-5.38868
Pik3r1	-5.85165	9.72582	-0.758579	0.512053	0.999997	-5.38883
Arhgdia	-5.80379	9.68194	-0.758514	0.512086	0.999997	-5.38887
Cct5	-0.490098	23.1189	-0.752365	0.51245	0.999997	-5.39616
Hspe1	-5.47932	9.39741	-0.756542	0.513083	0.999997	-5.39035
Rps24	-0.748789	27.0093	-0.748487	0.514438	0.999997	-5.39903
Pls3	-1.01553	21.3311	-0.745696	0.516432	0.999997	-5.40056
Ltv1	0.592564	24.9225	0.744245	0.51662	0.999997	-5.40218
Rpa1	-5.50481	9.48394	-0.749428	0.516694	0.999997	-5.39567
Pebp1	-2.99558	19.0959	-0.748889	0.516968	0.999997	-5.39607
Rbm4;Rbm4b	4.38761	17.7633	0.747537	0.517658	0.999997	-5.39707
Dctn5	-5.47764	9.47933	-0.747056	0.517903	0.999997	-5.39743
Marcksl1	-5.41214	9.42285	-0.746417	0.518229	0.999997	-5.39791
Eif3f	-0.521717	22.8211	-0.740829	0.518383	0.999997	-5.4047
Tuba1a	-3.94757	20.66	-0.745698	0.518596	0.999997	-5.39844
Dglucy	5.53728	9.55399	0.744425	0.519246	0.999997	-5.39938
Tkt	-0.691999	22.3455	-0.739141	0.519256	0.999997	-5.40594
Me1	-5.44309	9.47262	-0.74412	0.519403	0.999997	-5.39961
Nanp	-5.08615	9.13926	-0.743293	0.519826	0.999997	-5.40022
Nek9	-5.38425	9.42594	-0.743054	0.519948	0.999997	-5.4004
Nherf2	5.56683	9.60604	0.741808	0.520586	0.999997	-5.40132
Kpna1	-5.46414	9.53071	-0.739884	0.521573	0.999997	-5.40275
Atp5mk	-5.31143	9.3855	-0.739726	0.521654	0.999997	-5.40286
Znf207	0.615559	23.0683	0.733024	0.522429	0.999997	-5.41043
Phgdh	-0.679268	26.1353	-0.732476	0.522714	0.999997	-5.41083
Vbp1	-5.35656	9.4695	-0.735157	0.524004	0.999997	-5.40624
Rabgap1	-4.81448	8.94641	-0.734934	0.524119	0.999997	-5.4064
Creb1	-5.25311	9.37138	-0.734928	0.524122	0.999997	-5.4064
Ndufb11	-5.31439	9.43205	-0.734777	0.5242	0.999997	-5.40651
Eloc	1.20601	20.0704	0.730028	0.525344	0.999997	-5.41129
Eif5a	-0.52362	23.0011	-0.727151	0.525492	0.999997	-5.41472
Cdc73	-5.22427	9.37746	-0.731051	0.526124	0.999997	-5.40925
Krt80	-5.22383	9.40687	-0.727677	0.527871	0.999997	-5.41173
Safb2	-5.08988	9.27782	-0.727411	0.528009	0.999997	-5.41192
Tmem19	-5.17524	9.3683	-0.726647	0.528405	0.999997	-5.41248
Lonp2	5.1631	9.35508	0.726175	0.52865	0.999997	-5.41282
Slc25a1	-0.528482	24.9267	-0.71845	0.530057	0.999997	-5.42103
Ptprf	-5.20308	9.42742	-0.723079	0.53026	0.999997	-5.41508
Ap2a1	-0.663873	21.9018	-0.717206	0.530712	0.999997	-5.42193
Phrf1	-0.645274	21.3928	-0.717086	0.530775	0.999997	-5.42201
Slc1a5	-0.617965	22.7067	-0.717015	0.530813	0.999997	-5.42206
Hadh	4.97271	9.2854	0.72143	0.531119	0.999997	-5.41628
Nek6;Nek7	7.57037	8.06379	0.720027	0.531851	0.999997	-5.41731
Arpc5l	-5.11213	9.37274	-0.71909	0.53234	0.999997	-5.41799
S100a14	-5.06883	9.33372	-0.718627	0.532582	0.999997	-5.41832
Aaas	-5.10516	9.37264	-0.718319	0.532742	0.999997	-5.41855
Sf3a3	-4.89715	9.16701	-0.718117	0.532848	0.999997	-5.41869
Denr	-0.635557	23.5018	-0.71096	0.534013	0.999997	-5.42642
Hnrnpm	-0.545396	24.4725	-0.710654	0.534175	0.999997	-5.42664
Znf746	7.35883	7.95802	0.712587	0.535745	0.999997	-5.4227
Ddx17	-0.479826	24.5015	-0.706234	0.536521	0.999997	-5.42981
Krt19	0.681931	30.5346	0.705782	0.536762	0.999997	-5.43013
Cct2	-0.631074	23.1813	-0.704804	0.537282	0.999997	-5.43083
Aebp1	0.547869	22.033	0.704705	0.537335	0.999997	-5.4309
Paqr5	7.25374	7.90548	0.70879	0.537742	0.999997	-5.42543
Nubp2	-4.93139	9.28301	-0.708688	0.537796	0.999997	-5.42551
Coq8a	-0.521621	21.3075	-0.703313	0.538077	0.999997	-5.43189
Akr7a2	1.18008	22.4893	0.700813	0.54078	0.999997	-5.43232
Rangap1	-4.84134	9.24297	-0.702787	0.540913	0.999997	-5.42975
Otub1	-0.489602	22.8785	-0.692224	0.544015	0.999997	-5.43976
Etfb	-0.710747	20.3126	-0.687099	0.546778	0.999997	-5.44337
Gtpbp2	-0.518473	21.156	-0.686863	0.546905	0.999997	-5.44353
Fasn	-0.641316	21.6463	-0.686141	0.547295	0.999997	-5.44404
Lonp1	-0.577333	21.4396	-0.683868	0.548525	0.999997	-5.44563
Hyou1	-0.88698	22.754	-0.683456	0.549066	0.999997	-5.44561
Ranbp10	-4.79752	14.1207	-0.68603	0.549845	0.999997	-5.44165
Stom	-0.774649	20.5463	-0.68024	0.550493	0.999997	-5.44817
Snrpb;Snrpn	0.533308	23.0302	0.679619	0.55083	0.999997	-5.4486
Ndufs1	-0.487963	23.0189	-0.678055	0.551681	0.999997	-5.44969
Krt81;Krt85;Krt86;Krt87	6.5559	7.55656	0.681709	0.552168	0.999997	-5.44469
Calr	-0.792452	22.7886	-0.675929	0.552838	0.999997	-5.45117
Rpl23	-1.26903	26.3807	-0.677868	0.553151	0.999997	-5.44846
Gemin2	6.50193	7.52957	0.679468	0.553375	0.999997	-5.44626
Echs1	0.629935	21.1409	0.674719	0.553498	0.999997	-5.45201
Herc4	-2.53657	19.1185	-0.678956	0.553652	0.999997	-5.44662
H2ac11;H2ac12;H2ac13;H2ac15;H2ac20;H2ac21;H2ac25;H2ac4;H2ac6;H2ac7;H2ac8;H2aj;Hist1h2af;Hist1h2an;Hist1h2ao;Hist1h2ap;Hist2h2aa1	6.4523	7.50476	0.677388	0.554499	0.999997	-5.44772
Coq5	6.3856	7.47141	0.674562	0.556027	0.999997	-5.44969
Ccdc88a	6.38041	7.46881	0.674341	0.556147	0.999997	-5.44985
Rpl28	-0.706298	27.2064	-0.669769	0.556204	0.999997	-5.45543
Vwa8	-4.64126	14.0984	-0.668025	0.559578	0.999997	-5.45424
Papolg	6.23125	7.39423	0.667885	0.559653	0.999997	-5.45433
Matr3	-0.660107	21.1865	-0.662595	0.560144	0.999997	-5.46037
Ezr	-0.538706	21.6517	-0.661787	0.560589	0.999997	-5.46092
Lrrc41	6.16967	7.36344	0.665167	0.561135	0.999997	-5.45621
Rpl32	1.36253	28.861	0.662992	0.561261	0.999997	-5.45877
Gtf3c5	-0.436404	21.5947	-0.659259	0.561984	0.999997	-5.46265
Yars1	-0.509615	26.361	-0.658262	0.562534	0.999997	-5.46333
Sdf2	6.06428	7.31075	0.660438	0.56372	0.999997	-5.45947
Usp9x	-0.433722	21.2694	-0.655868	0.563858	0.999997	-5.46496
Ranbp2	-2.89715	19.9766	-0.65785	0.565139	0.999997	-5.46125
Dync1h1	-0.583497	22.9766	-0.652585	0.565678	0.999997	-5.46719
Bcor;Bcorl1	5.94743	7.25232	0.655082	0.56666	0.999997	-5.46315
Pitpnm1	5.94605	7.25163	0.655018	0.566695	0.999997	-5.46319
Prpf8	-0.431195	21.3857	-0.650235	0.566984	0.999997	-5.46878
Cpa4	5.91942	7.23832	0.65378	0.567376	0.999997	-5.46404
Sf3b3	-0.448224	23.0431	-0.648104	0.56817	0.999997	-5.47022
Tubb6	-0.417927	23.7229	-0.646754	0.568922	0.999997	-5.47113
Api5	-0.481632	21.7655	-0.646486	0.569072	0.999997	-5.47131
Rpl10a	-0.436063	25.2873	-0.646	0.569343	0.999997	-5.47164
Snrnp200	-0.769445	21.3819	-0.645357	0.569702	0.999997	-5.47207
Zc3h11a	5.76934	7.16328	0.64668	0.571296	0.999997	-5.46887
Rbis	5.76185	7.15953	0.64632	0.571496	0.999997	-5.46911
Serac1	5.73861	7.14791	0.645199	0.572116	0.999997	-5.46987
Mlf1	5.71732	7.13727	0.644169	0.572688	0.999997	-5.47057
Cfap53	5.71507	7.13614	0.64406	0.572748	0.999997	-5.47064
Zrsr1;Zrsr2	5.70821	7.13271	0.643726	0.572933	0.999997	-5.47087
Baz1b	0.443634	23.3013	0.637348	0.574186	0.999997	-5.47744
Plscr3	5.64983	7.10352	0.640872	0.574519	0.999997	-5.47279
Zcchc9	-5.85568	9.34835	-0.640541	0.574703	0.999997	-5.47301
Ckmt1	5.58735	7.07228	0.637781	0.57624	0.999997	-5.47487
Prune1	0.460477	20.0496	0.633507	0.576345	0.999997	-5.47999
Ptrh2	5.55819	7.0577	0.636324	0.577052	0.999997	-5.47585
Plaa	-0.447457	20.3452	-0.631927	0.577236	0.999997	-5.48104
Ndufs8	-0.503627	4.02679	-0.630201	0.57821	0.999997	-5.48218
Sav1	5.51607	7.03664	0.634205	0.578236	0.999997	-5.47727
Sinhcaf	5.49999	7.0286	0.633391	0.578691	0.999997	-5.47781
Rpl27	-0.664775	27.6214	-0.629126	0.578817	0.999997	-5.48289
Mrps22	0.56549	21.0357	0.627619	0.579669	0.999997	-5.48389
Tubg1;Tubg2	0.707161	22.6272	0.627404	0.57979	0.999997	-5.48403
Atp5f1b	-0.414677	25.696	-0.627177	0.579919	0.999997	-5.48418
Acly	-0.429473	22.2133	-0.627125	0.579948	0.999997	-5.48421
Psmc2	-0.527931	22.6799	-0.626382	0.580369	0.999997	-5.4847
Spout1	1.1462	23.9912	0.628397	0.580488	0.999997	-5.48213
Pfkp	-0.513914	22.4692	-0.625057	0.58112	0.999997	-5.48558
Rpl38	0.519719	25.277	0.624623	0.581366	0.999997	-5.48586
Dpagt1	5.39918	6.9782	0.628227	0.581584	0.999997	-5.48125
Atm	5.37838	6.9678	0.627148	0.58219	0.999997	-5.48197
ObI1	1.21401	21.4529	0.625239	0.582269	0.999997	-5.48422
Ifitm3	-0.819886	22.1274	-0.623435	0.582368	0.999997	-5.48632
Riok1	-0.48308	22.4188	-0.622324	0.582671	0.999997	-5.48737
Chd6	5.35859	6.9579	0.626118	0.58277	0.999997	-5.48265
Actr8	5.33169	6.94445	0.62471	0.583562	0.999997	-5.48358
Hspa1l	0.652345	25.275	0.619326	0.584375	0.999997	-5.48933
Cpa3	-6.00139	9.76043	-0.621003	0.585652	0.999997	-5.48603
Gtpbp1	-0.445504	22.209	-0.616774	0.585829	0.999997	-5.491
Tmco1	0.407053	21.4678	0.61626	0.586122	0.999997	-5.49133
Sri	-0.680349	19.9482	-0.615412	0.586606	0.999997	-5.49189
Ehd2	-0.574152	20.5223	-0.615313	0.586663	0.999997	-5.49195
Ndufs2	-0.586399	22.1016	-0.614992	0.586846	0.999997	-5.49216
Mdh1	-0.876395	21.9042	-0.615834	0.586964	0.999997	-5.49102
Ngdn	0.489316	21.3803	0.613479	0.587711	0.999997	-5.49314
Sec16a	-0.416945	20.4168	-0.612159	0.588465	0.999997	-5.494
Dhx9	-0.654266	23.4689	-0.610034	0.589683	0.999997	-5.49537
Abcd3	0.412861	23.219	0.605977	0.592012	0.999997	-5.49799
Prpsap1	-4.75271	15.0795	-0.609122	0.592389	0.999997	-5.49381
Atl3	-4.2921	14.0744	-0.608235	0.592894	0.999997	-5.49438
Lamb1	0.86074	23.1724	0.604959	0.593183	0.999997	-5.49807
Cdc5l	-0.792961	20.5804	-0.604262	0.593312	0.999997	-5.49878
Stk3	-0.499038	19.2032	-0.603529	0.59342	0.999997	-5.49956
Mki67	-0.643784	22.6512	-0.60055	0.595138	0.999997	-5.50147
Purb	-0.462686	21.4903	-0.599235	0.595897	0.999997	-5.50231
RO60	-0.502505	23.4819	-0.5992	0.595917	0.999997	-5.50233
Lxn	0.604419	22.3133	0.598186	0.596503	0.999997	-5.50298
Mtnd5	4.90926	6.73324	0.601524	0.596729	0.999997	-5.49873
Uso1	-0.404149	21.7085	-0.596154	0.597679	0.999997	-5.50427
Eef1g	-0.505247	24.9102	-0.595809	0.597878	0.999997	-5.50449
Tamm41	-0.616374	20.6734	-0.595353	0.598143	0.999997	-5.50478
Cpsf7	-0.432986	21.4252	-0.594914	0.598397	0.999997	-5.50506
Rpl36a	0.39067	30.5085	0.594482	0.598647	0.999997	-5.50533
Znf260	4.83695	6.69708	0.597339	0.599129	0.999997	-5.50141
Arhgap5	-5.12352	8.94232	-0.596074	0.599856	0.999997	-5.50222
Slc50a1	4.79969	6.67845	0.595157	0.600384	0.999997	-5.50281
Ppm1g	-0.5442	20.9044	-0.591189	0.600559	0.999997	-5.50742
Aldoa	-0.560576	23.1072	-0.590712	0.600836	0.999997	-5.50772
Spon2	7.82337	22.5255	0.5935	0.601338	0.999997	-5.50387
Pak1ip1	0.475899	23.6371	0.589359	0.601623	0.999997	-5.50857
Adss2	4.54119	14.5205	0.591271	0.602623	0.999997	-5.50529
Gmds	0.436041	23.0184	0.586789	0.60312	0.999997	-5.51019
Pcna	0.378431	25.9503	0.584229	0.604613	0.999997	-5.51179
Senp3	-0.640605	22.074	-0.584047	0.604719	0.999997	-5.51191
Dym	-0.493387	20.5323	-0.583743	0.604897	0.999997	-5.5121
Edc3	-4.6003	14.9256	-0.586905	0.605147	0.999997	-5.50806
Vcp	-0.650767	22.0793	-0.580666	0.606696	0.999997	-5.51402
Samhd1	0.617452	21.9445	0.579674	0.607277	0.999997	-5.51464
Gars1	-0.4877	23.0481	-0.578811	0.607783	0.999997	-5.51517
Txn	-0.65807	27.3662	-0.578297	0.608084	0.999997	-5.51549
Esd	-0.443312	21.9854	-0.577764	0.608397	0.999997	-5.51582
Tk1	4.55908	6.55815	0.580626	0.60879	0.999997	-5.51202
Fhod1	-0.442625	4.05729	-0.575439	0.609762	0.999997	-5.51727
Mapk1	0.486441	22.5594	0.574771	0.610154	0.999997	-5.51768
Ifrd2	4.96373	15.4972	0.577502	0.610608	0.999997	-5.51397
Cars1	4.78588	15.2031	0.576993	0.610905	0.999997	-5.51429
Gzf1	0.754994	21.5371	0.573883	0.610977	0.999997	-5.51794
Pdk3	0.388974	21.7619	0.571805	0.6119	0.999997	-5.51951
Tcp1	0.37941	25.8547	0.571354	0.612166	0.999997	-5.51979
Dync2i2	-0.436249	4.06048	-0.569363	0.61334	0.999997	-5.52101
Zc2hc1a	-0.379252	20.429	-0.569325	0.613362	0.999997	-5.52104
Trub1	4.63928	14.8546	0.571862	0.613902	0.999997	-5.51749
Acaca	-0.369143	20.533	-0.567882	0.614214	0.999997	-5.52192
Rpl9	-0.572044	26.5903	-0.566824	0.61484	0.999997	-5.52257
Rpl34	-0.421352	26.6263	-0.565718	0.615493	0.999997	-5.52325
Dag1	-0.430498	4.06336	-0.563824	0.616615	0.999997	-5.5244
Mcm3	0.407822	21.6468	0.562145	0.61761	0.999997	-5.52542
Ddx52	-0.570423	21.8215	-0.562106	0.617633	0.999997	-5.52545
Ywhaq	-0.76699	22.7309	-0.56016	0.619209	0.999997	-5.52622
Hax1	-2.52727	19.857	-0.562391	0.619462	0.999997	-5.52333
Mark2	0.490859	21.8268	0.558722	0.619643	0.999997	-5.5275
Hnrnpc	0.485691	21.9206	0.558557	0.619741	0.999997	-5.5276
Krt17	0.4273	23.4954	0.556558	0.62093	0.999997	-5.52881
Ppp2r2d	-0.645819	20.1379	-0.555652	0.62147	0.999997	-5.52936
Plec	-0.447567	22.0842	-0.555338	0.621657	0.999997	-5.52954
Lrpprc	-0.47986	21.9701	-0.553569	0.622712	0.999997	-5.53061
Ddx3x	-0.44261	25.4587	-0.552595	0.623293	0.999997	-5.53119
Aldh2	0.446342	22.8068	0.551378	0.62402	0.999997	-5.53192
Bax	-0.41664	4.07029	-0.550245	0.624696	0.999997	-5.5326
Rfc5	0.482198	22.6824	0.549965	0.624864	0.999997	-5.53277
Phf10	-4.61173	15.2471	-0.552264	0.625448	0.999997	-5.5295
Eif4a3	-0.412717	24.6291	-0.546676	0.626833	0.999997	-5.53473
Sec23a	-0.641264	22.1151	-0.546674	0.626835	0.999997	-5.53473
Sun2	0.376088	20.1738	0.546275	0.627073	0.999997	-5.53497
Ubxn1	-0.392395	23.389	-0.544059	0.628403	0.999997	-5.53629
Lmnb1	-0.450287	26.4766	-0.543438	0.628776	0.999997	-5.53665
Rsl1d1	0.369984	24.8551	0.543013	0.629031	0.999997	-5.53691
Rps4x	-0.354449	27.2092	-0.54039	0.630609	0.999997	-5.53846
Ddi2	4.17898	14.5013	0.541025	0.632141	0.999997	-5.53624
Pank4	-0.387275	20.3531	-0.537376	0.632425	0.999997	-5.54023
Ubl7	-0.403742	4.07674	-0.537313	0.632463	0.999997	-5.54027
Prpf38b	0.395461	24.2118	0.534891	0.633925	0.999997	-5.54169
Dcaf10	-4.75572	9.20098	-0.533959	0.636374	0.999997	-5.54043
Mthfd1	-0.396193	23.0401	-0.530363	0.636665	0.999997	-5.54433
Srsf2	0.61906	21.345	0.528852	0.637581	0.999997	-5.54521
Fam76b	4.82423	15.7195	0.53179	0.637678	0.999997	-5.5417
Utp18	4.60446	15.5688	0.53053	0.638436	0.999997	-5.54244
Sap30bp	0.936424	22.3723	0.527945	0.639168	0.999997	-5.54474
Rrm1	0.470034	21.3548	0.524966	0.639941	0.999997	-5.54745
Cse1l	-0.514243	25.0398	-0.524717	0.640092	0.999997	-5.5476
Rpl35a	-0.703806	25.0112	-0.523049	0.641442	0.999997	-5.54824
Itga3	-0.452005	21.5184	-0.520961	0.64238	0.999997	-5.54976
Prdx3	-0.619626	21.9314	-0.519563	0.643232	0.999997	-5.55056
Tmem33	-0.566749	24.2898	-0.518546	0.643853	0.999997	-5.55114
Gnai2	-0.470382	20.706	-0.514645	0.646238	0.999997	-5.55336
Ptdss2	-0.636078	21.0523	-0.513293	0.647162	0.999997	-5.55403
Prkag1	-0.441661	21.8658	-0.513116	0.647175	0.999997	-5.55423
Bud13	0.378807	24.053	0.512987	0.647254	0.999997	-5.5543
Sntb2	-0.42049	20.5164	-0.512262	0.647698	0.999997	-5.55471
Ndufs7	-0.362087	21.1458	-0.511961	0.647882	0.999997	-5.55488
Mat2a	0.330372	23.3824	0.50964	0.649307	0.999997	-5.55619
Dhx15	-0.330194	22.6434	-0.509476	0.649407	0.999997	-5.55628
Trrap	-4.56346	9.21601	-0.511505	0.64996	0.999997	-5.55344
H1-0	0.374766	25.3484	0.507362	0.650707	0.999997	-5.55747
Stat1	-0.413972	22.0361	-0.506307	0.651356	0.999997	-5.55806
Vars1	-0.33725	22.0657	-0.506241	0.651397	0.999997	-5.5581
Snx12	-0.356549	20.2842	-0.505119	0.652088	0.999997	-5.55873
Znf800	-0.454352	20.9516	-0.504083	0.652726	0.999997	-5.5593
Esrra;Esrrb	-4.38685	9.00666	-0.506681	0.652905	0.999997	-5.55618
Vps45	-4.46394	9.13834	-0.505927	0.653366	0.999997	-5.5566
Ublcp1	-0.410524	22.4418	-0.501645	0.654229	0.999997	-5.56066
Cdipt	-0.328077	24.1632	-0.499999	0.655246	0.999997	-5.56158
Ppil3	4.00807	14.7815	0.501738	0.655932	0.999997	-5.55896
Fam133b	0.622976	23.5931	0.499031	0.655961	0.999997	-5.562
Ddx41	0.496997	26.5748	0.498284	0.656306	0.999997	-5.56253
Nub1	0.575431	19.8944	0.497873	0.656561	0.999997	-5.56275
Tubb2b	-0.366821	24.4761	-0.497678	0.656681	0.999997	-5.56286
Psme3	-0.58292	22.9035	-0.497047	0.657072	0.999997	-5.56321
Eif3a	-0.566599	22.3352	-0.496115	0.657649	0.999997	-5.56372
Uap1l1	0.437019	20.5561	0.495488	0.658037	0.999997	-5.56407
Naa15	-0.404473	22.3847	-0.495163	0.658239	0.999997	-5.56425
Pkm	-0.444994	27.491	-0.493765	0.659105	0.999997	-5.56502
Ctbp1	0.374226	23.0431	0.493604	0.659205	0.999997	-5.5651
Isca2	0.872036	20.8372	0.494936	0.659345	0.999997	-5.56347
Rdh11	-0.428366	21.302	-0.493244	0.659429	0.999997	-5.5653
Mpst	4.46429	15.8324	0.492875	0.661383	0.999997	-5.5639
Prpf19	-0.343195	21.9841	-0.489881	0.661518	0.999997	-5.56714
Tufm	-0.343561	26.1538	-0.489609	0.661687	0.999997	-5.56729
Rps6	0.383682	27.9943	0.488737	0.662229	0.999997	-5.56777
Slc2a1	-0.341492	23.8322	-0.488426	0.662423	0.999997	-5.56793
Mars1	-0.559672	21.8742	-0.487828	0.662795	0.999997	-5.56826
Prkd3	-4.28479	9.10937	-0.48769	0.664586	0.999997	-5.56675
Pold1	0.3435	22.219	0.484774	0.664699	0.999997	-5.56992
Znf593	0.337778	21.9972	0.484661	0.664769	0.999997	-5.56998
Fxr1	1.0473	22.3943	0.485924	0.664927	0.999997	-5.56842
Psmc3	-0.527847	21.2885	-0.483896	0.665246	0.999997	-5.57039
Cct3	-0.387611	22.4207	-0.482568	0.666075	0.999997	-5.57111
Igkv12-41	-2.55855	20.4212	-0.485227	0.666112	0.999997	-5.5681
Mapk14	0.313669	22.114	0.482094	0.666372	0.999997	-5.57136
Sucla2	0.430004	21.8141	0.48207	0.666386	0.999997	-5.57137
Stt3a	-0.311662	23.4163	-0.480989	0.667062	0.999997	-5.57196
Esyt2	-0.316997	22.0342	-0.480305	0.66749	0.999997	-5.57232
Dsp	0.403204	23.0298	0.479634	0.667909	0.999997	-5.57268
Ap2m1	0.350917	24.6696	0.479449	0.668025	0.999997	-5.57278
Noc3l	0.773691	23.2136	0.47619	0.670871	0.999997	-5.57379
Ddx18	0.398325	26.0385	0.474902	0.670875	0.999997	-5.57521
Atp5f1c	-0.43066	25.1446	-0.474141	0.671352	0.999997	-5.57561
Rfc1	0.434309	21.2233	0.474016	0.671431	0.999997	-5.57568
Eif6	0.305779	22.5127	0.473383	0.671828	0.999997	-5.57602
Copb2	-0.320797	21.2771	-0.47201	0.672691	0.999997	-5.57674
Akt2	0.726798	21.3824	0.470794	0.674114	0.999997	-5.57679
Pfkl	0.849097	22.8252	0.469237	0.675345	0.999997	-5.57738
Copb1	-0.305471	24.6195	-0.467517	0.675519	0.999997	-5.57911
Srrt	-0.791781	20.7379	-0.468018	0.676084	0.999997	-5.57805
Rab11a;Rab11b	-0.451529	22.69	-0.466184	0.676359	0.999997	-5.57981
Zcchc17	0.955919	25.6463	0.46736	0.676524	0.999997	-5.57837
Psmc4	-0.305477	22.9717	-0.465306	0.676914	0.999997	-5.58027
Vrk1	4.65574	16.3833	0.466747	0.677629	0.999997	-5.57804
Dpp3	-0.324689	20.9007	-0.463982	0.67775	0.999997	-5.58096
Auh	-0.335318	4.11095	-0.463886	0.67781	0.999997	-5.58101
Tdg	-0.85194	20.0892	-0.465208	0.677877	0.999997	-5.5795
Pck2	-0.636641	21.4653	-0.464257	0.677921	0.999997	-5.5805
Itpr2	-2.14947	7.81537	-0.466213	0.677963	0.999997	-5.57832
Uqcrc2	0.299649	23.5591	0.463326	0.678164	0.999997	-5.5813
Ccar2	-0.384045	20.1639	-0.461924	0.67905	0.999997	-5.58203
Urah	0.568574	23.2467	0.46036	0.680114	0.999997	-5.58278
Tbc1d10b	-0.488321	21.7983	-0.460047	0.680238	0.999997	-5.58301
Atp6v1a	0.321724	21.1084	0.459656	0.680485	0.999997	-5.58321
Myadm	3.64953	10.4111	0.457169	0.683649	0.999997	-5.58306
Rbm14	-0.29424	24.3019	-0.453902	0.684135	0.999997	-5.58617
Rap2c	-0.294541	22.0736	-0.452361	0.685114	0.999997	-5.58696
Prps1	-0.356702	23.0264	-0.451499	0.685663	0.999997	-5.5874
Blm	-2.56593	21.3336	-0.453366	0.686048	0.999997	-5.58503
Ctbp2	0.304247	23.0691	0.45068	0.686184	0.999997	-5.58781
Mtnd1	-3.58679	10.3744	-0.45265	0.686501	0.999997	-5.5854
Map2k4	-0.371444	21.8365	-0.449919	0.686668	0.999997	-5.5882
Iars1	-0.488864	22.656	-0.449462	0.68696	0.999997	-5.58843
Srpk1	0.899589	22.5289	0.449877	0.687564	0.999997	-5.58745
Mta1	-0.753766	21.1066	-0.447497	0.689045	0.999997	-5.58869
Nono	-0.507566	24.2759	-0.444786	0.689942	0.999997	-5.5908
Mrpl46	-0.374499	22.2914	-0.442719	0.691263	0.999997	-5.59184
Gspt1	-0.518802	21.5682	-0.442629	0.691321	0.999997	-5.59188
Ppp3ca	0.439697	21.6497	0.440903	0.692425	0.999997	-5.59275
Sf3b1	-0.527429	22.2907	-0.440487	0.692699	0.999997	-5.59295
Ddx21	-0.652416	22.4449	-0.441101	0.692803	0.999997	-5.5922
Afg3l2	-0.295807	21.9917	-0.439777	0.693145	0.999997	-5.59331
Drg1	-0.343768	22.96	-0.436785	0.695063	0.999997	-5.59479
Cmas	0.331374	23.6047	0.436551	0.695213	0.999997	-5.59491
Pcbp1	-0.293231	26.0679	-0.435047	0.696179	0.999997	-5.59565
Ncln	-0.394067	22.5058	-0.434676	0.696418	0.999997	-5.59584
Lpcat1	0.387447	21.4105	0.434201	0.696723	0.999997	-5.59607
Farp2	-0.307816	4.1247	-0.432067	0.698094	0.999997	-5.59712
Rusc1	-3.47353	10.4602	-0.433794	0.698482	0.999997	-5.59496
Ece1	2.68469	5.62095	0.433187	0.698869	0.999997	-5.59526
Tars1	-0.492034	20.3357	-0.430773	0.698927	0.999997	-5.59776
Igf2bp2	-0.447988	20.983	-0.430394	0.699171	0.999997	-5.59794
Psmd4	-0.404003	22.973	-0.430366	0.699189	0.999997	-5.59796
Pa2g4	-0.693616	22.7529	-0.430288	0.699937	0.999997	-5.59739
Mrpl37	-0.789634	20.1857	-0.42915	0.700797	0.999997	-5.59783
Bag6	-4.59031	12.6302	-0.429479	0.701242	0.999997	-5.5971
Glrx3	0.402018	22.0213	0.427154	0.701259	0.999997	-5.59952
Abcf3	-0.307378	19.8684	-0.426314	0.701801	0.999997	-5.59993
Naca	-0.309481	23.7237	-0.42575	0.702165	0.999997	-5.60021
Hadhb	-0.281253	23.2407	-0.42528	0.702468	0.999997	-5.60043
Rpl21	-0.721991	25.9905	-0.426451	0.702507	0.999997	-5.59917
Idh2	-0.318508	23.3312	-0.424584	0.702918	0.999997	-5.60077
Nid1	0.481115	23.2956	0.424344	0.703073	0.999997	-5.60089
Map1b	-0.378503	20.0713	-0.423802	0.703423	0.999997	-5.60115
Trim21	1.2716	24.9846	0.425627	0.703711	0.999997	-5.59899
Impdh2	-0.290807	22.7591	-0.422737	0.704111	0.999997	-5.60166
Dnm2	-0.567506	22.0559	-0.421956	0.704881	0.999997	-5.60181
NARS1	0.432892	21.9867	0.419186	0.70641	0.999997	-5.60337
Zfp646	3.61762	10.9256	0.420884	0.706759	0.999997	-5.6013
Jup	0.33222	23.4381	0.41831	0.706977	0.999997	-5.60379
Prkca;Prkcb	2.54966	5.55344	0.419458	0.707677	0.999997	-5.60199
Ptcd2	-0.294765	4.13122	-0.416507	0.708146	0.999997	-5.60465
Atxn10	0.270914	21.8842	0.414955	0.709154	0.999997	-5.60538
Tbc1d4	2.5226	5.53991	0.416642	0.709491	0.999997	-5.60335
Trap1	-0.349111	23.6035	-0.41387	0.709858	0.999997	-5.6059
Eef2	-0.366276	25.1753	-0.413611	0.710026	0.999997	-5.60602
Pkp1	0.298846	22.5296	0.413455	0.710128	0.999997	-5.60609
Orc5	-0.512294	21.4538	-0.412932	0.710545	0.999997	-5.60627
Eif4a1	-0.273569	27.5787	-0.412639	0.710658	0.999997	-5.60648
Opa1	-0.311041	20.2379	-0.41254	0.710723	0.999997	-5.60653
Supt16h	-0.522751	23.411	-0.412552	0.710836	0.999997	-5.60642
Lama1	0.709708	22.9683	0.413341	0.710993	0.999997	-5.60547
Ino80b	0.455176	22.1094	0.411464	0.711423	0.999997	-5.60703
Bag1	-0.288103	21.3275	-0.410555	0.712014	0.999997	-5.60746
Pura	-0.79093	23.1066	-0.410084	0.713105	0.999997	-5.60701
Psma7	-0.556052	22.4102	-0.407753	0.714126	0.999997	-5.60853
Ehd4	-0.394656	21.7687	-0.405072	0.715587	0.999997	-5.61002
Drg2	0.299911	22.3248	0.404301	0.716091	0.999997	-5.61038
Pdk1	0.395372	21.7577	0.403361	0.716704	0.999997	-5.61081
Grwd1	0.417775	19.9237	0.401122	0.718168	0.999997	-5.61185
Smu1	-3.34096	10.7169	-0.402759	0.718479	0.999997	-5.60993
Scaf4;Scaf8	-4.16149	12.2282	-0.402688	0.718524	0.999997	-5.60996
Marcks	-4.30318	12.7502	-0.402133	0.718885	0.999997	-5.61022
Tube1	-0.28069	4.13826	-0.399397	0.719297	0.999997	-5.61264
Cyfip1	-0.270448	22.0672	-0.398387	0.719958	0.999997	-5.6131
Dpy19l1	-0.441355	24.8057	-0.398374	0.719967	0.999997	-5.61311
Cdk9	0.270572	21.9033	0.398331	0.719995	0.999997	-5.61313
Praf2	-0.307792	20.8058	-0.396328	0.721307	0.999997	-5.61404
Znf771	0.595914	25.1811	0.396682	0.721562	0.999997	-5.61348
Tram1	0.29497	21.6213	0.395294	0.721986	0.999997	-5.61452
Ktn1	-0.33081	22.3732	-0.394233	0.722682	0.999997	-5.615
Ran	-0.303207	27.7793	-0.394143	0.722741	0.999997	-5.61504
Tubb5	-0.276236	30.3173	-0.393916	0.72289	0.999997	-5.61514
Ap1g1	-0.407934	21.1206	-0.393825	0.722949	0.999997	-5.61518
Atp2a2	-0.264897	24.3837	-0.393737	0.723007	0.999997	-5.61522
Colgalt1	-0.419507	20.7515	-0.393098	0.723427	0.999997	-5.61551
Pdhb	-0.290876	22.8219	-0.392802	0.723621	0.999997	-5.61565
Ppp1r13l	-0.274911	4.14115	-0.392273	0.723969	0.999997	-5.61588
Rps14	-0.321283	26.522	-0.391932	0.724193	0.999997	-5.61604
Zfa;Zfx	0.380728	23.5925	0.391918	0.724202	0.999997	-5.61604
Dars2	-0.660592	21.7534	-0.391482	0.725208	0.999997	-5.61565
Eno1	-0.308385	25.1088	-0.389762	0.72562	0.999997	-5.61702
Tnpo1	-0.266332	22.561	-0.388711	0.726311	0.999997	-5.61749
Vdac1	-0.424392	23.345	-0.387508	0.727103	0.999997	-5.61802
Rbm15b	0.270351	20.8218	0.386929	0.727485	0.999997	-5.61828
Lamc2	-0.269345	4.14393	-0.385358	0.728521	0.999997	-5.61898
Dpm1	0.352958	23.7317	0.384598	0.729021	0.999997	-5.61932
Cdkn1b	-3.08838	10.5151	-0.38547	0.729762	0.999997	-5.61785
Pdcd6ip	-0.480905	23.2669	-0.382736	0.730347	0.999997	-5.62007
Dnajc2	-3.13156	10.627	-0.384048	0.730695	0.999997	-5.61849
Sub1	0.723867	22.2744	0.38313	0.730718	0.999997	-5.61938
Qars1	-0.261188	21.2957	-0.380993	0.731401	0.999997	-5.62091
Iqgap1	-0.247492	22.6057	-0.380991	0.731403	0.999997	-5.62091
Plekhf1	-0.265705	4.14575	-0.380808	0.731524	0.999997	-5.621
Acaa2	0.392519	20.879	0.380165	0.731949	0.999997	-5.62128
Sfpq	-0.329056	22.9938	-0.379661	0.732282	0.999997	-5.6215
Gcn1	-0.271133	22.7756	-0.379555	0.732352	0.999997	-5.62155
Ipo5	-0.246797	22.6906	-0.379057	0.732681	0.999997	-5.62176
Gfpt1	-0.333276	21.8993	-0.378988	0.732727	0.999997	-5.62179
Ero1a	0.264138	23.0598	0.37801	0.733374	0.999997	-5.62222
Rabggta	-0.263099	4.14706	-0.377536	0.733688	0.999997	-5.62243
Tuba4a	-0.460331	26.6504	-0.377446	0.733783	0.999997	-5.62244
Metap1	-0.45218	23.6368	-0.376232	0.734563	0.999997	-5.62299
Gnl3	0.595646	25.1393	0.376972	0.734622	0.999997	-5.62222
Odr4	0.557068	22.0617	0.373414	0.73686	0.999997	-5.62387
Arl6ip5	0.249487	4.40335	0.372737	0.736868	0.999997	-5.62451
C1ql4	0.249115	4.40316	0.372229	0.737205	0.999997	-5.62473
Shoc2	0.248679	4.40295	0.371634	0.7376	0.999997	-5.62499
Ostc	-0.519906	21.0642	-0.371055	0.738305	0.999997	-5.62498
Tns4	0.247847	4.40253	0.370497	0.738355	0.999997	-5.62548
Map3k2	0.247707	4.40246	0.370305	0.738482	0.999997	-5.62556
Elavl1	-0.323384	24.8191	-0.370224	0.738536	0.999997	-5.62559
Hsdl2	0.247381	4.4023	0.369859	0.738779	0.999997	-5.62575
Uqcrc1	0.256764	22.5725	0.369109	0.739277	0.999997	-5.62607
Zdhhc13	0.245895	4.40155	0.367824	0.740131	0.999997	-5.62662
Ctnnb1	0.245265	21.9255	0.367487	0.740356	0.999997	-5.62676
Ppid	0.245587	4.4014	0.367401	0.740412	0.999997	-5.6268
Pop5	-3.05782	10.7935	-0.368918	0.740658	0.999997	-5.62515
Fmo2	0.244491	4.40085	0.365897	0.741413	0.999997	-5.62744
Ca5b	0.244317	4.40077	0.36566	0.741571	0.999997	-5.62754
Steap3	0.244243	4.40073	0.365558	0.741639	0.999997	-5.62759
Ctnnd1	-0.23945	21.0642	-0.364442	0.742382	0.999997	-5.62806
Smc1a	-0.431903	22.8596	-0.364289	0.742484	0.999997	-5.62812
Macroh2a1	0.754247	22.5873	0.365302	0.742501	0.999997	-5.62715
Lap3	-2.76717	12.6786	-0.365872	0.742673	0.999997	-5.62646
Ctnna1	-0.235253	20.9006	-0.362827	0.743458	0.999997	-5.62874
Bmi1	0.242083	4.39965	0.362587	0.743618	0.999997	-5.62884
Ddx5	-0.38152	26.4264	-0.361979	0.744024	0.999997	-5.6291
Mcu	-2.80909	12.3179	-0.363788	0.744054	0.999997	-5.62736
Cbx6	0.24158	4.3994	0.361896	0.744079	0.999997	-5.62913
Sart1	0.370225	23.5032	0.361867	0.744098	0.999997	-5.62914
Krt5	0.383824	27.1742	0.361631	0.744256	0.999997	-5.62924
Oat	-0.527735	21.4248	-0.36198	0.744401	0.999997	-5.6288
Ercc3	-2.01703	15.6714	-0.363149	0.744477	0.999997	-5.62763
Slc27a1	0.241027	4.39912	0.361133	0.744588	0.999997	-5.62945
Map2k7	-0.428136	21.1028	-0.360043	0.745315	0.999997	-5.62991
Hspd1	-0.300995	24.0538	-0.359011	0.746004	0.999997	-5.63034
Slc41a1	-0.248417	4.1544	-0.358893	0.746083	0.999997	-5.63039
Pip5k1a	0.23901	4.39811	0.358351	0.746445	0.999997	-5.63062
H2bc12;H2bc14;H2bc3;H2bc4;H2bc7;H2bc9;Hist1h2bp;Hist2h2bb	0.28989	28.5738	0.357941	0.746719	0.999997	-5.63079
Cbx4	0.612527	23.2322	0.35876	0.746846	0.999997	-5.62992
Sdha	0.428116	22.3016	0.357111	0.747282	0.999997	-5.63112
C1qbp	-2.83449	10.4563	-0.358633	0.747474	0.999997	-5.62954
Ptpn12	-2.79833	12.7425	-0.358624	0.747479	0.999997	-5.62955
Atp6v1h	-0.229728	23.3332	-0.356451	0.747715	0.999997	-5.63141
Dlg1	0.237243	4.39723	0.355909	0.748078	0.999997	-5.63163
Dvl2	-0.355388	22.3489	-0.355556	0.748314	0.999997	-5.63178
Map2k3	0.301285	23.165	0.355555	0.748315	0.999997	-5.63178
Pes1	-0.50071	22.3599	-0.355891	0.748399	0.999997	-5.6314
Snrnp70	-0.337047	21.6915	-0.355326	0.748468	0.999997	-5.63187
Mtpap	0.298078	20.3918	0.355004	0.748683	0.999997	-5.632
Clu	-0.349722	23.2945	-0.35445	0.749054	0.999997	-5.63223
Hmgcl	0.236189	4.3967	0.354449	0.749054	0.999997	-5.63223
Lrrc59	0.676219	23.5528	0.355397	0.749091	0.999997	-5.63132
Vwa5a	0.463736	20.2564	0.354112	0.74945	0.999997	-5.63224
Bbx	-0.598006	21.256	-0.3548	0.749465	0.999997	-5.63159
Exosc9	-2.81138	10.4707	-0.355066	0.749845	0.999997	-5.63104
Slc38a1	0.235167	4.39619	0.353034	0.750002	0.999997	-5.63282
Acot9	0.232287	23.3062	0.352703	0.750223	0.999997	-5.63295
Aph1a	0.234151	4.39568	0.351624	0.750946	0.999997	-5.6334
Rnf2	0.253554	21.2348	0.351607	0.750958	0.999997	-5.6334
Rrp12	0.346065	23.0431	0.351323	0.751148	0.999997	-5.63352
Irak1	-0.354629	20.4916	-0.350833	0.751476	0.999997	-5.63372
Abraxas2	0.233135	4.39517	0.350213	0.751892	0.999997	-5.63397
Rrp1b	-0.658187	22.6891	-0.350567	0.752316	0.999997	-5.63332
Xrcc1	0.232272	4.39474	0.349014	0.752696	0.999997	-5.63446
Nol12	0.511289	24.7551	0.348772	0.753231	0.999997	-5.63427
Plod2	-0.2776	21.2191	-0.347874	0.753462	0.999997	-5.63492
Rpl29	0.573463	30.0677	0.348038	0.753945	0.999997	-5.6344
Ywhae	-0.402534	22.4021	-0.347149	0.753948	0.999997	-5.63522
Dhx8	0.423312	20.3589	0.347141	0.753986	0.999997	-5.6352
Ubr4	-0.576718	21.0442	-0.347951	0.754015	0.999997	-5.63443
Casp1	-0.239019	4.1591	-0.346772	0.754201	0.999997	-5.63537
Lman1	0.230599	4.39391	0.346684	0.75426	0.999997	-5.63541
Armc10	0.230515	4.39386	0.346567	0.754339	0.999997	-5.63545
Srpra	-0.322554	22.479	-0.345804	0.754851	0.999997	-5.63576
Lig3	0.229906	4.39356	0.345719	0.754909	0.999997	-5.6358
Mtr	0.229299	4.39326	0.344872	0.755478	0.999997	-5.63614
Gsk3b	0.329204	21.2168	0.344633	0.755639	0.999997	-5.63623
Pnpla6	0.228654	4.39293	0.343972	0.756083	0.999997	-5.6365
Iah1	2.68373	12.8816	0.344975	0.756575	0.999997	-5.63521
H2ac21	0.228044	4.39263	0.34312	0.756656	0.999997	-5.63684
Synj1	0.228028	4.39262	0.343098	0.756671	0.999997	-5.63685
Snx2	-0.233436	22.3597	-0.34274	0.756912	0.999997	-5.63699
Phb2	-0.271565	25.4815	-0.342586	0.757015	0.999997	-5.63705
Cdkal1	-0.30526	20.0103	-0.341951	0.757443	0.999997	-5.63731
Rabif	-0.481104	22.0246	-0.341507	0.758039	0.999997	-5.63726
Usp7	-0.344788	20.8858	-0.338736	0.759608	0.999997	-5.63859
Xpo5	0.524615	20.4068	0.33868	0.760112	0.999997	-5.63826
Ube4b	0.224255	4.39073	0.337817	0.760228	0.999997	-5.63895
Raly	2.80787	13.154	0.339451	0.760273	0.999997	-5.63744
Foxk1	0.223507	4.39036	0.336768	0.760935	0.999997	-5.63936
Pcmtd1	0.222794	4.39	0.335768	0.76161	0.999997	-5.63976
Ehd1	-0.231758	21.1972	-0.334758	0.762292	0.999997	-5.64015
Cpne1	-0.240141	22.4688	-0.334647	0.762367	0.999997	-5.6402
Mark3	0.221821	4.38952	0.334401	0.762533	0.999997	-5.64029
Cyp2s1	-0.229312	4.16395	-0.334103	0.762735	0.999997	-5.64041
Gpatch4	0.306309	24.4905	0.333851	0.762905	0.999997	-5.64051
Cbl	-0.229059	4.16408	-0.33377	0.762959	0.999997	-5.64054
Parp9	0.221342	4.38928	0.333727	0.762988	0.999997	-5.64056
Krt18	-0.276681	24.5827	-0.333613	0.763065	0.999997	-5.6406
Hexb	0.221237	4.38923	0.33358	0.763088	0.999997	-5.64062
Krt10	0.254274	27.516	0.333436	0.763185	0.999997	-5.64067
Plcg2	0.270176	21.3828	0.332695	0.763686	0.999997	-5.64096
Ift172	-2.42471	9.87021	-0.333308	0.764395	0.999997	-5.63988
Polr2c	2.85897	13.2639	0.332773	0.764755	0.999997	-5.6401
Vps35l	-0.62614	22.8464	-0.33186	0.764873	0.999997	-5.64082
Cyrib	0.219228	4.38822	0.33075	0.765001	0.999997	-5.64172
Ufl1	-0.471923	21.5968	-0.330687	0.765349	0.999997	-5.64152
Rab5a	-0.261611	24.9931	-0.330141	0.765413	0.999997	-5.64195
Lsm4	0.218132	4.38767	0.329205	0.766046	0.999997	-5.64231
Nr2f1;Nr2f2	0.218123	4.38767	0.329193	0.766054	0.999997	-5.64232
Myo1d	-0.327809	20.8058	-0.328711	0.766381	0.999997	-5.6425
Ncoa5	2.79133	13.4165	0.329775	0.766772	0.999997	-5.64127
Dnm1l	-0.317256	22.2754	-0.327666	0.767089	0.999997	-5.64291
Hsd17b8	0.216884	4.38705	0.327444	0.767239	0.999997	-5.64299
Rpn2	-0.325158	22.4539	-0.326912	0.767599	0.999997	-5.6432
Polr1f	0.363742	25.4212	0.326872	0.767626	0.999997	-5.64321
Rpl7	0.223802	29.4088	0.326463	0.767903	0.999997	-5.64337
Ints5	-2.82537	13.0609	-0.327266	0.768461	0.999997	-5.64225
Tab1	0.261066	22.3145	0.32555	0.768522	0.999997	-5.64372
Pole	0.215372	4.38629	0.325306	0.768687	0.999997	-5.64381
Dis3	-0.322612	23.445	-0.325086	0.768837	0.999997	-5.64389
Klf12;Klf3	-0.22241	4.1674	-0.325001	0.768894	0.999997	-5.64393
Il1rap	0.21482	4.38602	0.324525	0.769217	0.999997	-5.64411
Eif4b	-0.452604	23.3068	-0.324821	0.769284	0.999997	-5.6438
Ttc9	0.214663	4.38594	0.324303	0.769368	0.999997	-5.64419
Sec61a2	-2.63075	13.2271	-0.325146	0.76989	0.999997	-5.64307
Qki	0.213923	4.38557	0.323255	0.770079	0.999997	-5.64459
Lbr	-0.271151	25.1936	-0.322134	0.77084	0.999997	-5.64502
Prdx5	0.215499	24.002	0.321315	0.771396	0.999997	-5.64533
Arih2	0.212358	4.38479	0.321037	0.771585	0.999997	-5.64543
Smc4	-0.562658	21.4154	-0.321326	0.771991	0.999997	-5.64489
Isca1	0.21174	4.38448	0.320161	0.77218	0.999997	-5.64576
Gnl2	0.596877	23.2655	0.320803	0.772345	0.999997	-5.64508
Aprt	0.210851	4.38403	0.318898	0.773039	0.999997	-5.64623
Rpn1	-0.504097	22.5653	-0.319069	0.77339	0.999997	-5.64583
Rpl7a	-0.30224	28.5733	-0.317797	0.773787	0.999997	-5.64665
Actn1	-0.699495	21.039	-0.318667	0.773792	0.999997	-5.64589
Apex1	-0.344775	22.8005	-0.316767	0.774488	0.999997	-5.64703
Pgm3	-0.476548	20.0832	-0.317278	0.774522	0.999997	-5.64657
Lin7c	0.208883	4.38305	0.3161	0.774942	0.999997	-5.64728
Smyd5	0.208619	4.38292	0.315724	0.775198	0.999997	-5.64742
Mrtfb	0.208413	4.38281	0.315431	0.775397	0.999997	-5.64753
Slc25a4	0.214354	24.1015	0.31532	0.775473	0.999997	-5.64757
Ctps1	0.227568	23.9158	0.315159	0.775583	0.999997	-5.64763
Ecm1	0.207904	4.38256	0.314705	0.775892	0.999997	-5.6478
Slc25a22	0.272835	23.2442	0.31389	0.776447	0.999997	-5.6481
Rab28	-2.84629	13.7476	-0.315195	0.776617	0.999997	-5.64686
Eloa	0.207029	4.38212	0.313459	0.77674	0.999997	-5.64826
Mapk3	-0.361038	23.6342	-0.313098	0.776987	0.999997	-5.64839
Faf2	0.268782	24.146	0.312266	0.777554	0.999997	-5.6487
Mpp1	0.206117	4.38167	0.312159	0.777627	0.999997	-5.64874
Osbpl9	-2.62119	13.4239	-0.313526	0.777747	0.999997	-5.64748
Zmym4	2.90541	13.7783	0.313458	0.777794	0.999997	-5.64751
Eif2s3x	0.555697	23.3451	0.312419	0.778033	0.999997	-5.64823
Wasf2	0.205675	4.38144	0.311527	0.778057	0.999997	-5.64897
Mapk4	0.205426	4.38132	0.311171	0.7783	0.999997	-5.6491
Nsf	-0.54489	21.8021	-0.311525	0.778641	0.999997	-5.64856
Zfp184	0.20431	4.38076	0.309577	0.779388	0.999997	-5.64968
Atg9a	-2.68316	13.7112	-0.310669	0.779685	0.999997	-5.64854
Cdc20	0.203739	4.38048	0.308761	0.779945	0.999997	-5.64998
Lyar	0.331885	23.8028	0.308462	0.78015	0.999997	-5.65009
Nf1	-2.5036	13.161	-0.309949	0.780174	0.999997	-5.64881
Mrpl40	0.407983	21.3309	0.308161	0.78051	0.999997	-5.65009
Rcbtb2	-0.209508	4.17385	-0.307789	0.780609	0.999997	-5.65033
Ddx39b	-0.214761	25.4856	-0.307371	0.780895	0.999997	-5.65048
Eprs1	-0.465717	23.2146	-0.30687	0.781623	0.999997	-5.65039
Nfib	-0.334823	22.0133	-0.305229	0.782358	0.999997	-5.65126
Ulk3	0.20115	4.37918	0.305055	0.782477	0.999997	-5.65132
Dck	0.20113	4.37917	0.305026	0.782497	0.999997	-5.65133
Mcm7	-0.474866	23.8678	-0.305187	0.782805	0.999997	-5.65098
Ankfy1	0.300239	21.9742	0.303305	0.783675	0.999997	-5.65195
Anxa7	0.580532	22.4021	0.303743	0.783941	0.999997	-5.6514
Med19	0.302656	25.1018	0.30287	0.783972	0.999997	-5.6521
Fth1	0.199478	4.37835	0.302656	0.784119	0.999997	-5.65218
Ca6	0.19933	4.37827	0.302444	0.784264	0.999997	-5.65225
Ncaph	0.233416	21.847	0.30179	0.784711	0.999997	-5.65249
Nagk	-2.51666	13.5395	-0.303274	0.784712	0.999997	-5.65125
Riox1	-2.37989	12.878	-0.303216	0.784751	0.999997	-5.65127
Ssr1	0.232535	22.3122	0.301162	0.785142	0.999997	-5.65271
Fahd2	-3.33943	10.904	-0.302372	0.785326	0.999997	-5.65158
Kif3b	0.198237	4.37773	0.300875	0.785338	0.999997	-5.65281
Znf48	0.21807	24.5612	0.300537	0.78557	0.999997	-5.65293
Krt42	0.260701	26.1523	0.300435	0.78564	0.999997	-5.65297
Gtf3a	0.197874	4.37754	0.300353	0.785696	0.999997	-5.653
Erp44	-0.538845	21.7755	-0.301066	0.785768	0.999997	-5.65236
Ipo13	0.197746	4.37748	0.300168	0.785822	0.999997	-5.65306
Anapc5	-2.45417	12.9147	-0.301087	0.786201	0.999997	-5.65204
Gsdmd	0.196866	4.37704	0.298903	0.786689	0.999997	-5.65351
Arfgef2	0.196609	4.37691	0.298532	0.786943	0.999997	-5.65364
Stk38	-0.33224	26.0094	-0.298471	0.786985	0.999997	-5.65366
Tbc1d17	0.196179	4.3767	0.297914	0.787367	0.999997	-5.65386
Mta2	0.370238	21.8967	0.297522	0.787696	0.999997	-5.65396
Dstn	0.742956	23.5283	0.298051	0.787986	0.999997	-5.65332
Irf2bpl	0.195419	4.37632	0.296819	0.788118	0.999997	-5.65425
Znf668	0.328897	25.6973	0.296676	0.788216	0.999997	-5.6543
Ube2m	-0.668965	21.7211	-0.297452	0.788238	0.999997	-5.65364
Cdk7	0.195296	4.37626	0.296642	0.788239	0.999997	-5.65431
Cebpb	0.195167	4.37619	0.296456	0.788367	0.999997	-5.65437
Copg1	0.297876	23.476	0.296384	0.788417	0.999997	-5.6544
Slc25a19	0.195084	4.37615	0.296337	0.788449	0.999997	-5.65441
Tmem70	0.19478	4.376	0.295899	0.78875	0.999997	-5.65457
Phlda3	0.194751	4.37598	0.295857	0.788778	0.999997	-5.65458
Ssrp1	-0.238564	21.5754	-0.294286	0.789857	0.999997	-5.65513
Zcchc7	0.218587	20.3354	0.293476	0.790413	0.999997	-5.65541
Phb1	-0.296934	24.726	-0.293132	0.79065	0.999997	-5.65553
Runx1	0.19282	4.37502	0.293072	0.790691	0.999997	-5.65555
Mrpl47	0.252414	22.8826	0.293018	0.790728	0.999997	-5.65557
Get3	0.19278	4.375	0.293014	0.790731	0.999997	-5.65557
Zc3h8	0.19235	4.37478	0.292393	0.791158	0.999997	-5.65579
Igkc	-0.607468	29.097	-0.292975	0.791303	0.999997	-5.65522
Sdcbp	2.55514	13.5086	0.293164	0.791607	0.999997	-5.65486
Mtrex	-0.284334	20.5487	-0.29133	0.791888	0.999997	-5.65615
Stx18	0.19154	4.37438	0.291222	0.791962	0.999997	-5.65619
Sod1	0.1912	4.37421	0.290731	0.7923	0.999997	-5.65636
Mcm4	-0.294055	22.5469	-0.29053	0.792438	0.999997	-5.65643
Rpl17	0.679462	30.6942	0.29109	0.792635	0.999997	-5.65584
Chd2	0.477868	22.6777	0.290862	0.792698	0.999997	-5.65599
Rpl10	0.486881	26.6105	0.290277	0.793131	0.999997	-5.65617
Vamp7	0.189956	4.37359	0.28893	0.793539	0.999997	-5.65698
Tm9sf3	0.44461	21.3415	0.289047	0.793841	0.999997	-5.65668
Myo1c	0.260289	22.187	0.288216	0.79403	0.999997	-5.65722
Lsm14b	0.189415	4.37332	0.288149	0.794077	0.999997	-5.65725
Slc25a12	-0.218153	22.0799	-0.287881	0.794261	0.999997	-5.65734
Eci2	0.189171	4.37319	0.287794	0.794321	0.999997	-5.65737
Psma3	-0.19766	22.5109	-0.287529	0.794503	0.999997	-5.65746
Gmppa	-0.298154	20.4908	-0.287337	0.794636	0.999997	-5.65752
Rala	0.188844	4.37303	0.287321	0.794646	0.999997	-5.65753
Cct6a	0.231074	23.1464	0.286613	0.795134	0.999997	-5.65777
Sclt1	-3.33322	11.328	-0.28799	0.795147	0.999997	-5.65666
Zc3hav1	0.188308	4.37276	0.286544	0.795181	0.999997	-5.65779
Irgq	0.18796	4.37259	0.28604	0.795529	0.999997	-5.65796
Ddx54	-0.194854	25.6904	-0.28603	0.795536	0.999997	-5.65797
Gdpd1	0.187896	4.37256	0.285946	0.795593	0.999997	-5.65799
Ppp2r1a	-0.265421	22.3697	-0.285906	0.795621	0.999997	-5.65801
Tango6	0.187791	4.3725	0.285794	0.795698	0.999997	-5.65805
Phf6	0.362458	27.0991	0.2859	0.795707	0.999997	-5.65796
Ccdc47	0.202231	21.987	0.285746	0.795731	0.999997	-5.65806
Tcaf1	2.57887	13.7954	0.286915	0.795884	0.999997	-5.65703
Capn2	-0.406673	22.3712	-0.285475	0.796177	0.999997	-5.65798
Nars2	0.187052	4.37213	0.284722	0.796437	0.999997	-5.65841
Rplp0	0.3359	23.7465	0.28416	0.796825	0.999997	-5.6586
Clk3	0.922582	21.4577	0.285533	0.796831	0.999997	-5.6575
Hint2	0.186353	4.37178	0.283709	0.797135	0.999997	-5.65875
Map2k1	0.243592	23.6094	0.283627	0.797192	0.999997	-5.65878
Psmc5	-0.296636	22.9123	-0.283382	0.797361	0.999997	-5.65886
Tecr	0.19981	24.5354	0.283181	0.7975	0.999997	-5.65893
Pof1b	0.185531	4.37137	0.282514	0.797959	0.999997	-5.65915
Map2k2	0.285787	22.6311	0.282496	0.797972	0.999997	-5.65916
Ascc3	-2.39991	13.3756	-0.283666	0.798111	0.999997	-5.65814
Hspa1a;Hspa1b	0.372451	24.5136	0.282226	0.798297	0.999997	-5.65916
Serpinb6	0.237523	25.6088	0.28132	0.798783	0.999997	-5.65955
Mrpl2	0.184613	4.37091	0.281181	0.79888	0.999997	-5.6596
Gdi2	-0.22502	20.9363	-0.280745	0.799181	0.999997	-5.65974
Rps28	-0.511996	23.3821	-0.280946	0.799563	0.999997	-5.65933
Snrpd3	0.221926	23.2683	0.28001	0.799688	0.999997	-5.65999
Ap1m1	-0.455587	20.6424	-0.280439	0.799844	0.999997	-5.65955
Mybbp1a	-0.290873	24.2765	-0.279734	0.799878	0.999997	-5.66008
Ano10	2.50793	13.4782	0.280927	0.799991	0.999997	-5.65907
Katna1	0.18253	4.36987	0.27815	0.800972	0.999997	-5.6606
Add1	-3.10431	10.9506	-0.279397	0.801042	0.999997	-5.65958
Cdk6	0.182436	4.36983	0.278013	0.801067	0.999997	-5.66065
Grb2	0.230122	21.6294	0.277531	0.8014	0.999997	-5.66081
Chmp4b	0.586539	19.9229	0.277451	0.80197	0.999997	-5.6605
Diras1	-0.18647	4.18537	-0.276422	0.802167	0.999997	-5.66117
Actb;Actg1	-0.351501	28.4879	-0.276475	0.802212	0.999997	-5.6611
Abhd14b	0.181181	4.3692	0.276184	0.802331	0.999997	-5.66125
Alkbh5	-2.36619	13.4128	-0.2769	0.802758	0.999997	-5.66042
Aldh18a1	-0.184192	24.8099	-0.275526	0.802786	0.999997	-5.66146
Fads1	-0.192948	20.6729	-0.27552	0.802791	0.999997	-5.66147
Map3k3	-0.27749	20.4262	-0.275507	0.802799	0.999997	-5.66147
Srsf1	0.347065	23.2564	0.275486	0.802886	0.999997	-5.66143
Ppp5c	0.180285	4.36875	0.274877	0.803235	0.999997	-5.66168
Sar1b	0.372426	21.1749	0.273189	0.80459	0.999997	-5.66211
Parp3	0.178852	4.36803	0.272786	0.804683	0.999997	-5.66236
Rbfox1;Rbfox2	0.17874	4.36798	0.272622	0.804796	0.999997	-5.66241
Nmt2	-0.277404	20.6888	-0.272544	0.80485	0.999997	-5.66244
Hsph1	0.221072	22.595	0.272362	0.804976	0.999997	-5.66249
Gaa	0.30082	20.4984	0.272315	0.805008	0.999997	-5.66251
Hnrnpk	0.217739	24.6829	0.271989	0.805234	0.999997	-5.66261
Rfc4	-0.17557	21.2632	-0.271428	0.805623	0.999997	-5.6628
Csnk1e	-0.389162	21.3138	-0.27151	0.805819	0.999997	-5.66261
Mrm3	-0.182589	4.18731	-0.271061	0.805877	0.999997	-5.66291
Avl9	0.177665	4.36744	0.271052	0.805883	0.999997	-5.66292
Ctu2	-0.182482	4.18737	-0.270913	0.80598	0.999997	-5.66296
Gpd1l	-0.177	21.1917	-0.270647	0.806164	0.999997	-5.66305
Kdm2a	2.463	13.7435	0.271706	0.806334	0.999997	-5.66213
Actl6a	-0.610833	22.6904	-0.270451	0.806801	0.999997	-5.66279
Bop1	-2.36443	12.6709	-0.271017	0.806809	0.999997	-5.66235
Edf1	0.17635	4.36678	0.269129	0.807216	0.999997	-5.66353
Stn1	0.17588	4.36655	0.26844	0.807694	0.999997	-5.66375
Nmnat1	-0.180509	4.18835	-0.268179	0.807875	0.999997	-5.66384
Nsd2	-0.467024	20.9409	-0.268883	0.807884	0.999997	-5.6633
Vps4b	-0.23227	19.9752	-0.26805	0.807964	0.999997	-5.66388
Ercc6l	0.174933	4.36607	0.267054	0.808655	0.999997	-5.6642
Maged1	0.174843	4.36603	0.266922	0.808747	0.999997	-5.66424
Rela	0.17459	4.3659	0.266552	0.809004	0.999997	-5.66436
Maoa	0.174512	4.36586	0.266437	0.809083	0.999997	-5.66439
Exosc2	0.174135	4.36567	0.265885	0.809466	0.999997	-5.66457
Ripk1	0.174086	4.36565	0.265813	0.809516	0.999997	-5.66459
Snrnp40	-2.24132	13.0805	-0.266914	0.809639	0.999997	-5.66368
Prkacb	-0.238897	23.6583	-0.265491	0.80974	0.999997	-5.66469
Ppm1a	0.173843	4.36553	0.265457	0.809763	0.999997	-5.6647
Cbx2	-2.49454	14.3034	-0.266242	0.810103	0.999997	-5.6639
Adamts1	-2.27058	13.4022	-0.266185	0.810142	0.999997	-5.66392
Flna	-0.229272	22.9327	-0.264507	0.810423	0.999997	-5.665
Cnih4	-0.421935	21.3293	-0.264542	0.810798	0.999997	-5.66474
Wdhd1	-2.76648	10.4059	-0.264806	0.811095	0.999997	-5.66436
P4ha2	0.172528	4.36487	0.263528	0.811103	0.999997	-5.66531
Fus	-0.405388	21.7192	-0.263997	0.811124	0.999997	-5.66495
Dnaja1	-0.197177	22.4876	-0.263264	0.811286	0.999997	-5.66539
Mrpl23	-2.6115	14.2398	-0.264424	0.811359	0.999997	-5.66448
Utp6	0.171758	4.36449	0.262397	0.811889	0.999997	-5.66566
Unc119b	0.171562	4.36439	0.262109	0.812089	0.999997	-5.66575
Gnai3	0.171385	4.3643	0.261849	0.812269	0.999997	-5.66583
Tiprl	0.228982	22.302	0.261479	0.812527	0.999997	-5.66595
Cbx8	-0.212916	22.8394	-0.261284	0.812662	0.999997	-5.66601
Pdlim5	0.178615	22.1169	0.260945	0.812898	0.999997	-5.66612
Ntpcr	-0.400777	23.2944	-0.261167	0.813087	0.999997	-5.66584
Scfd1	-3.12101	11.6882	-0.260755	0.813895	0.999997	-5.66564
Krt2	-0.231848	28.1458	-0.259479	0.813917	0.999997	-5.66657
Psma5	-0.243848	22.4036	-0.259466	0.813927	0.999997	-5.66657
Osgep	-0.441706	20.7764	-0.25962	0.814291	0.999997	-5.66624
Bcr	-2.18535	13.2864	-0.259874	0.814505	0.999997	-5.66592
Ddx46	-0.518826	20.1855	-0.259211	0.814583	0.999997	-5.66636
Dpf2	2.5635	14.4966	0.259665	0.81465	0.999997	-5.66598
Smap1;Smap2	0.168953	4.36308	0.258273	0.814756	0.999997	-5.66694
Gnas	0.28728	23.9618	0.257878	0.815031	0.999997	-5.66706
Rpp25l	0.168509	4.36286	0.257621	0.815211	0.999997	-5.66714
Mov10	-2.32581	13.8254	-0.258487	0.815465	0.999997	-5.66635
Aip	0.168255	4.36273	0.257246	0.815471	0.999997	-5.66726
Rnf121	0.16809	4.36265	0.257003	0.81564	0.999997	-5.66733
Ipo7	0.223026	23.3092	0.256935	0.815688	0.999997	-5.66735
Ring1	0.167982	4.3626	0.256845	0.815751	0.999997	-5.66738
Stat3	-0.420116	23.3054	-0.256668	0.816297	0.999997	-5.66718
Sbno1	0.167341	4.36228	0.2559	0.816408	0.999997	-5.66767
Ints7	0.189829	20.9814	0.255745	0.816516	0.999997	-5.66772
Ppil4	0.623547	25.3034	0.256387	0.816639	0.999997	-5.66717
Aco1	0.193179	20.3503	0.254658	0.817274	0.999997	-5.66805
Rpl3	0.343753	29.2449	0.254116	0.817814	0.999997	-5.66812
Myo5b	-0.619368	23.6307	-0.254444	0.817988	0.999997	-5.66777
Psmb3	2.29401	13.7535	0.254568	0.81818	0.999997	-5.66756
Plpbp	0.165585	4.3614	0.253312	0.818212	0.999997	-5.66846
Rab38	0.165423	4.36132	0.253072	0.818379	0.999997	-5.66853
Mup1;Mup11;Mup17;Mup18;Mup2;Mup5;Mup6	-0.169563	4.19383	-0.252911	0.818492	0.999997	-5.66858
Cdc7	0.164988	4.3611	0.252431	0.818826	0.999997	-5.66872
Tmem68	0.164921	4.36107	0.252331	0.818896	0.999997	-5.66875
Dlat	-0.319668	20.6608	-0.252418	0.818907	0.999997	-5.66868
Cdh2	-2.76131	10.7719	-0.253248	0.819096	0.999997	-5.66797
Ddx24	-0.264045	21.6669	-0.251839	0.819239	0.999997	-5.6689
Nktr	0.164258	4.36074	0.251353	0.819578	0.999997	-5.66905
Add3	0.164258	4.36074	0.251353	0.819578	0.999997	-5.66905
Atp6v1g1	0.164151	4.36068	0.251195	0.819688	0.999997	-5.66909
Tomm40l	0.164138	4.36068	0.251175	0.819702	0.999997	-5.6691
Npepps	-0.304748	24.4865	-0.250952	0.819879	0.999997	-5.66915
Spint2	0.163913	4.36056	0.250844	0.819933	0.999997	-5.6692
Upf2	0.287128	21.6154	0.250728	0.820014	0.999997	-5.66923
Ptpn1	2.48301	14.5215	0.251888	0.820039	0.999997	-5.66838
Rdh13	-0.167727	4.19474	-0.250334	0.820289	0.999997	-5.66935
Mad2l1	0.221398	24.1104	0.250239	0.820355	0.999997	-5.66938
Vps33b	0.163181	4.3602	0.249762	0.820688	0.999997	-5.66952
Mrps34	-0.274267	21.4762	-0.249074	0.821168	0.999997	-5.66973
Tmed9	-0.265073	21.8847	-0.249019	0.821206	0.999997	-5.66974
Asl	0.16249	4.35985	0.24874	0.821401	0.999997	-5.66983
Capn7	0.162453	4.35983	0.248685	0.82144	0.999997	-5.66984
Seh1l	2.24288	13.7831	0.249459	0.821726	0.999997	-5.66912
Tmem185b	0.162086	4.35965	0.248144	0.821818	0.999997	-5.67
Pcbp2	-0.187959	26.2847	-0.248041	0.821889	0.999997	-5.67003
Med25;Ptov1	-2.64568	10.5419	-0.249042	0.822015	0.999997	-5.66925
RtcA	0.160091	20.5607	0.247526	0.822249	0.999997	-5.67019
Apmap	0.161344	4.35928	0.247046	0.822585	0.999997	-5.67033
Dipk2a	-2.77898	11.0142	-0.248019	0.822726	0.999997	-5.66955
Alg5	-2.79742	11.0813	-0.247834	0.822855	0.999997	-5.66961
Rpl5	0.346837	25.0715	0.245848	0.823633	0.999997	-5.67056
Itih2	0.160271	4.35874	0.245458	0.823694	0.999997	-5.6708
Glo1	0.160024	4.35862	0.245091	0.823951	0.999997	-5.6709
Dcun1d5	0.15979	4.3585	0.244744	0.824193	0.999997	-5.671
Smc2	-0.403459	21.7657	-0.244883	0.824504	0.999997	-5.67072
Fbln1	0.15944	4.35833	0.244226	0.824555	0.999997	-5.67116
Nup85	-0.169567	21.8074	-0.244025	0.824696	0.999997	-5.67121
Ostf1	0.159237	4.35823	0.243925	0.824766	0.999997	-5.67124
Cops6	2.30818	14.0942	0.244966	0.824848	0.999997	-5.67046
Ube2q1;Ube2q2	0.159095	4.35815	0.243715	0.824912	0.999997	-5.6713
Aldh3a1	0.159067	4.35814	0.243673	0.824942	0.999997	-5.67132
Ppa2	0.158768	4.35799	0.243231	0.825251	0.999997	-5.67145
Mrps16	-0.251035	21.2123	-0.242928	0.825463	0.999997	-5.67153
Dhx30	-0.280235	22.4925	-0.24288	0.825497	0.999997	-5.67155
Blvra	-0.177712	23.4333	-0.242322	0.825887	0.999997	-5.67171
Atl2	2.04133	13.2798	0.243288	0.826016	0.999997	-5.67096
Med18	0.157834	4.35752	0.241845	0.826221	0.999997	-5.67185
Elp1	-0.312502	20.3403	-0.241689	0.826428	0.999997	-5.67184
Slc12a7	0.157634	4.35742	0.241549	0.826428	0.999997	-5.67193
Tmem11	0.21823	21.2833	0.24115	0.826707	0.999997	-5.67205
Ddx51	0.15735	4.35728	0.241128	0.826723	0.999997	-5.67206
Atpaf1	-2.57788	10.5542	-0.242218	0.826761	0.999997	-5.67127
Ddx27	-0.223671	23.8744	-0.239525	0.827845	0.999997	-5.67252
Dnaja2	-0.186834	22.9496	-0.239257	0.828032	0.999997	-5.67259
Dcaf8	0.15599	4.3566	0.239108	0.828137	0.999997	-5.67264
Ldha	0.292778	28.3332	0.238908	0.828305	0.999997	-5.67268
Ecsit	0.155686	4.35645	0.238657	0.828453	0.999997	-5.67276
Cstf3	-0.159321	4.19895	-0.238476	0.82858	0.999997	-5.67282
Pdcd11	-2.35147	14.3585	-0.239551	0.828619	0.999997	-5.67205
Pdlim4	0.155493	4.35635	0.238371	0.828653	0.999997	-5.67285
RTRAF	0.155195	4.3562	0.237927	0.828964	0.999997	-5.67297
Cggbp1	-0.158862	4.19918	-0.237825	0.829035	0.999997	-5.673
Net1	-2.45458	10.2648	-0.238527	0.829332	0.999997	-5.67235
Rpl26	0.264473	28.4156	0.237164	0.829499	0.999997	-5.67319
Uba6	0.154611	4.35591	0.237059	0.829572	0.999997	-5.67322
Shpk	-0.15827	4.19947	-0.236986	0.829623	0.999997	-5.67324
Cln3	-2.64429	10.9337	-0.237976	0.829716	0.999997	-5.67251
Tars2	-0.265249	21.9421	-0.236605	0.829891	0.999997	-5.67335
Znf512	0.549479	26.187	0.237104	0.830001	0.999997	-5.67294
Arl6ip4	0.26865	27.6729	0.2364	0.830034	0.999997	-5.67341
Trpc4ap	-0.157422	4.1999	-0.235784	0.830466	0.999997	-5.67358
Cul4a	-2.41099	13.845	-0.236799	0.830537	0.999997	-5.67285
Map4k3	0.153266	4.35524	0.23506	0.830974	0.999997	-5.67378
Ppp1ca	0.157082	22.2656	0.235047	0.830983	0.999997	-5.67379
Ajuba;Brip1	-2.84237	11.7028	-0.235671	0.831324	0.999997	-5.67317
Myd88	0.152512	4.35486	0.233937	0.831762	0.999997	-5.6741
Arg2	0.152194	4.3547	0.233464	0.832094	0.999997	-5.67423
Cstb	0.154168	26.8981	0.233353	0.832172	0.999997	-5.67426
Aqr	0.151998	4.35461	0.233172	0.832298	0.999997	-5.67431
Pdxk	0.151996	4.35461	0.23317	0.8323	0.999997	-5.67431
Gpaa1	0.151978	4.3546	0.233142	0.832319	0.999997	-5.67432
Ntmt1	-2.63821	11.062	-0.234055	0.832452	0.999997	-5.67363
Magoh;Magohb	-2.42924	10.3395	-0.233915	0.83255	0.999997	-5.67367
Prorp	-2.6266	11.0437	-0.233484	0.83285	0.999997	-5.67379
Lgals7	0.217705	25.29	0.232356	0.832871	0.999997	-5.67454
Prrc2a	-2.06977	13.4763	-0.232433	0.833584	0.999997	-5.67409
Eya2	-2.53348	10.7646	-0.232272	0.833697	0.999997	-5.67413
Sp1	0.150563	4.35389	0.231035	0.833799	0.999997	-5.67491
Tnpo2	-2.61512	11.0642	-0.231922	0.833941	0.999997	-5.67423
Parvb	-2.55115	10.8426	-0.231851	0.833991	0.999997	-5.67425
Naa38	0.150078	4.35365	0.230311	0.834307	0.999997	-5.67511
Pop7	-0.153488	4.20186	-0.230192	0.834391	0.999997	-5.67514
Fgf2	-0.519264	21.0666	-0.23043	0.834647	0.999997	-5.67484
Atp9a	0.149691	4.35345	0.229733	0.834713	0.999997	-5.67527
Plcd1	0.149522	4.35337	0.229481	0.83489	0.999997	-5.67534
Mto1	-1.9868	13.6095	-0.230287	0.835083	0.999997	-5.67469
Nras	-0.186208	21.7793	-0.229088	0.835166	0.999997	-5.67544
Rpl11	-0.26276	27.19	-0.229076	0.835174	0.999997	-5.67545
Vangl2	0.149218	4.35322	0.229029	0.835208	0.999997	-5.67546
Sel1l	-2.39511	10.4037	-0.230101	0.835213	0.999997	-5.67474
Npm3	0.149078	4.35315	0.22882	0.835354	0.999997	-5.67552
Mrpl17	-0.152078	4.20257	-0.228183	0.835802	0.999997	-5.67569
Scly	0.148494	4.35285	0.227948	0.835967	0.999997	-5.67576
Slc25a11	-0.171415	25.3349	-0.227939	0.835973	0.999997	-5.67576
[truncated: 1,556 more rows]
