# Supplementary material
Source: Research Square preprint supplement (doi:10.21203/rs.3.rs-10069476/v1)
Supplement: Supplementary file 5 [file c1731d4ff57409be60dba013.xlsx]

## Sheet: Supplementary Table 2
The primers for qPCR used in this study
Primers	Sequences (5’ to 3’)
Hprt1-qPCR-F	CTGGTGAAAAGGACCTCTCGAAG
Hprt1-qPCR-R	CCAGTTTCACTAATGACACAAACG
Spon2-qPCR-F	ACTCTGGACCCATCGGGGTA
Spon2-qPCR-R	GAAGAACTTCTCCTCCTTGCTT
Slc38a1-qPCR-F	TACCAGAGCACAGGCGACATTC
Slc38a1-qPCR-R	ATGGCGGCACAGGTGGAACTTT
Aldoc-qPCR-F	AGAAGGAGTTGTCGGATATTGCT
Aldoc-qPCR-R	TTCTCCACCCCAATTTGGCTC
Ldha-qPCR-F	GGGCTACAAGCATCTTGAGAG
Ldha-qPCR-R	GACACGTTGCACCTGACTG
Eno1-qPCR-F	TGCGTCCACTGGCATCTAC
Eno1-qPCR-R	CAGAGCAGGCGCAATAGTTTTA
Acaa1-qPCR-F	TCTCCAGGACGTGAGGCTAAA
Acaa1-qPCR-R	CGCTCAGAAATTGGGCGATG
Aldh2-qPCR-F	GACGCCGTCAGCAGGAAAA
Aldh2-qPCR-R	CGCCAATCGGTACAACAGC
Acaa2-qPCR-F	CTGCTACGAGGTGTGTTCATC
Acaa2-qPCR-R	AGCTCTGCATGACATTGCCC
Acsl4-qPCR-F	GCTATCTCCTCAGACACACCGA
Acsl4-qPCR-R	AGGTGCTCCAACTCTGCCAGTA
Aco2-qPCR-F	ATCGAGCGGGGAAAGACATAC
Aco2-qPCR-R	TGATGGTACAGCCACCTTAGG
Mdh2-qPCR-F	TTGGGCAACCCCTTTCACTC
Mdh2-qPCR-R	GCCTTTCACATTTGCTCTGGTC
Sdhb-qPCR-F	AATTTGCCATTTACCGATGGGA
Sdhb-qPCR-R	AGCATCCAACACCATAGGTCC
Sdhc-qPCR-F	GCTGCGTTCTTGCTGAGACA
Sdhc-qPCR-R	ATCTCCTCCTTAGCTGTGGTT
Cox4i1-qPCR-F	ATTGGCAAGAGAGCCATTTCTAC
Cox4i1-qPCR-R	CACGCCGATCAGCGTAAGT
Atp6v1b1-qPCR-F	AAGTTTGCCCAGTATGCTGAG
Atp6v1b1-qPCR-R	GCAGGATGTCCCCTGTGAA
Cox7c-qPCR-F	ATGTTGGGCCAGAGTATCCG
Cox7c-qPCR-R	ACCCAGATCCAAAGTACACGG
Cox7b-qPCR-F	TTGCCCTTAGCCAAAAACGC
Cox7b-qPCR-R	TCATGGAAACTAGGTGCCCTC
